# Supplementary material for: Mixed-lineage leukemia protein 2 suppresses ciliary assembly by the modulation of actin dynamics and vesicle transport
Source: PubMed Central journal article supplement (PMC6591415; doi:10.1038/s41421-019-0100-3), 2019-06-25
Supplement: 41421_2019_100_MOESM1_ESM.pdf [file 41421_2019_100_MOESM1_ESM.pdf]

## Supplementary information

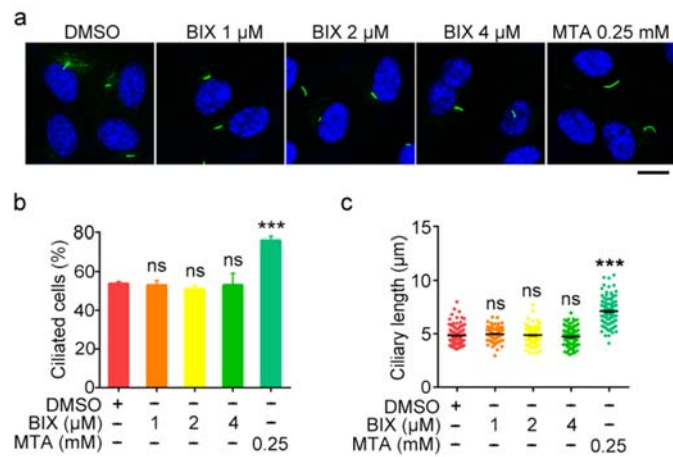

**Fig. S1 The H3K9 methyltransferase inhibitor BIX-01294 does not affect ciliogenesis.** Immunofluorescence images (**a**), percentage of ciliated cells (**b**,  $n = 200$ ), and ciliary length (**c**,  $n = 100$ ) for RPE-1 cells treated with the indicated concentrations of BIX-01294 (BIX) or MTA, serum-starved for 48 hours, and stained with acetylated  $\alpha$ -tubulin antibodies (green) and DAPI (blue). Scale bar, 10  $\mu\text{m}$ . \*\*\* $P < 0.001$ ; ns, not significant. Error bars indicate SEM.

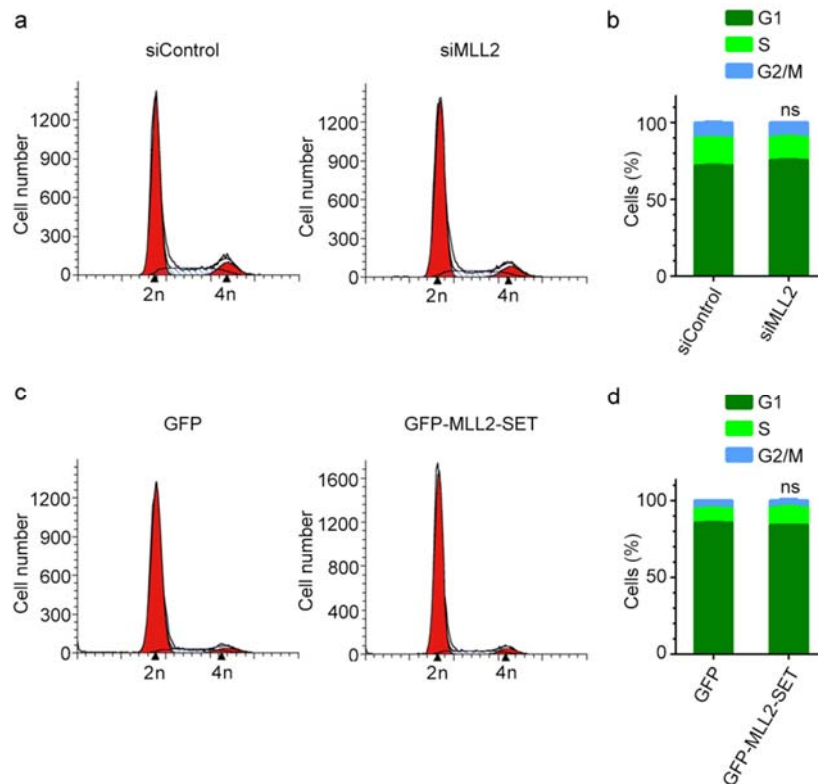

**Fig. S2 Depletion of MLL2 or overexpression of its SET domain does not alter the cell cycle.** **a, b** RPE-1 cells were transfected with control or MLL2 siRNAs for 48 hours, and the cell cycle was analyzed by flow cytometry (**a**). The percentages of cells in G1, S, and G2/M phases were then quantified (**b**). **c, d** RPE-1 cells were transfected with GFP or GFP-MLL2-SET for 48 hours, and the cell cycle was analyzed by flow cytometry (**c**). The percentages of cells in G1, S, and G2/M phases were then quantified (**d**). 2n, cells in G1; 4n, cells in G2/M. ns, not significant. Error bars indicate SEM.

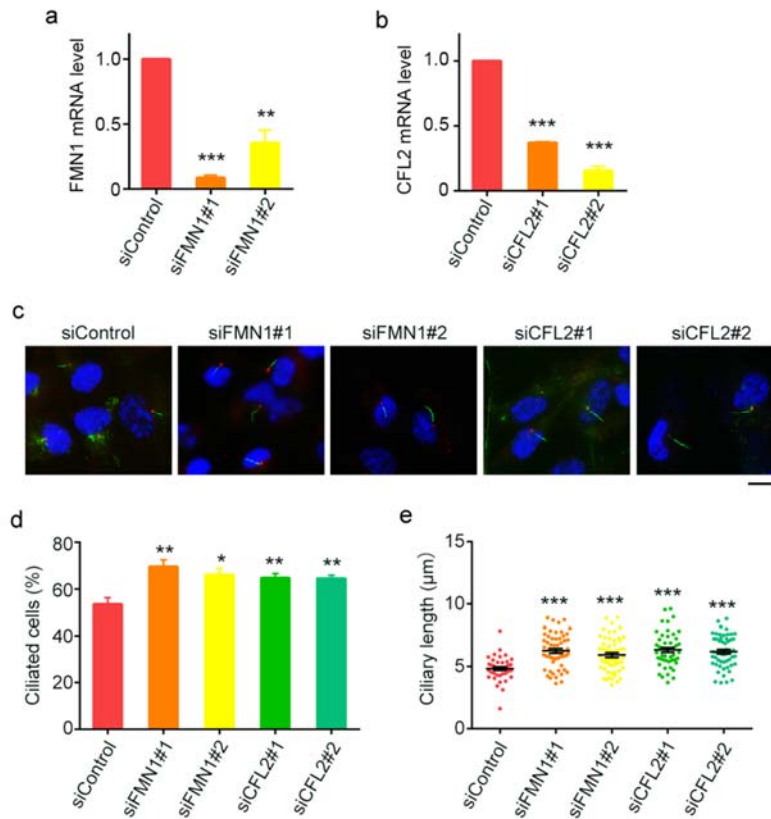

**Fig. S3 Knockdown of FMN1 or CFL2 promotes ciliogenesis.** **a, b** Quantitative RT-PCR analysis of FMN1 and CFL2 mRNA expression in RPE-1 cells transfected with the indicated siRNAs and serum-starved for 48 hours. **c-e** Immunofluorescence images (**c**), percentage of ciliated cells (**d**,  $n = 200$ ), and ciliary length (**e**,  $n = 50$ ) for RPE-1 cells transfected with the indicated siRNAs, serum-starved for 48 hours, and stained with antibodies against  $\gamma$ -tubulin (red) and acetylated  $\alpha$ -tubulin (green), and DAPI (blue). Scale bar, 10  $\mu\text{m}$ . \* $P < 0.05$ ; \*\* $P < 0.01$ ; \*\*\* $P < 0.001$ . Error bars indicate SEM.

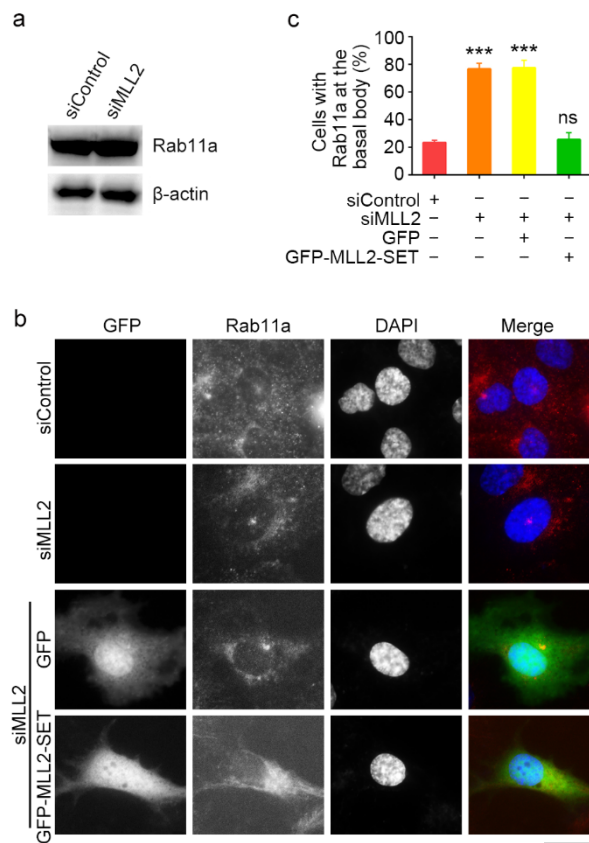

**Fig. S4 Overexpression of GFP-MLL2-SET could rescue MLL2 depletion-induced accumulation of Rab11a vesicles at the basal body.** **a** Immunoblot analysis of Rab11a and  $\beta$ -actin in RPE-1 cells transfected with control or MLL2 siRNAs and serum-starved for 48 hours. **b, c** Immunofluorescence images (**b**) and percentage of cells with Rab11a at the basal body (**c**,  $n = 100$ ) for RPE-1 cells transfected with the indicated siRNAs and plasmids, serum-starved for 24 hours, and stained with Rab11a antibodies (red) and DAPI (blue). Scale bar, 10  $\mu\text{m}$ . \*\*\* $P < 0.001$ ; ns, not significant. Error bars indicate SEM.

**Table S1. Differentially expressed genes by MLL2 depletion under serum-starvation conditions.**

| ID        | Symbol         | Length  | FPKM-siControl | FPKM-siMLL2 | siMLL2/siControl |
|-----------|----------------|---------|----------------|-------------|------------------|
| 642799    | NPIPA2         | 1088    | 0.01           | 13.41       | Upregulation     |
| 100996928 | C7orf55-LUC7L2 | 2747    | 0.01           | 11.68       | Upregulation     |
| 4312      | MMP1           | 2081    | 0.01           | 5           | Upregulation     |
| 387522    | TMEM189-UBE2V1 | 2925    | 0.01           | 4.84        | Upregulation     |
| 8293      | SERF1A         | 1935    | 0.01           | 4.45        | Upregulation     |
| 11272     | PRR4           | 585     | 0.01           | 3.3         | Upregulation     |
| 3485      | IGFBP2         | 1200.34 | 0.01           | 2.93        | Upregulation     |
| 101180901 | IPO11-LRRC70   | 1818    | 0.01           | 2.47        | Upregulation     |
| 100528030 | POC1B-GALNT4   | 4740    | 0.01           | 2.29        | Upregulation     |
| 29907     | SNX15          | 1957    | 0.01           | 2.24        | Upregulation     |
| 100533105 | C8orf44-SGK3   | 4563    | 0.01           | 2.04        | Upregulation     |
| 100533955 | SEN3-EIF4A1    | 4303    | 0.01           | 1.57        | Upregulation     |
| 401428    | OR2A20P        | 930     | 0.01           | 1.51        | Upregulation     |
| 100526760 | ABHD14A-ACY1   | 1879    | 0.01           | 1.46        | Upregulation     |
| 100529855 | ZNF625-ZNF20   | 3418    | 0.01           | 1.24        | Upregulation     |
| 414224    | AGAP12P        | 2141    | 0.01           | 1.07        | Upregulation     |
| 378108    | TRIM74         | 1341    | 0.01           | 1.03        | Upregulation     |
| 135       | ADORA2A        | 2110.34 | 0.08           | 5.81        | Upregulation     |
| 9884      | LRRC37A        | 5177    | 0.01           | 0.64        | Upregulation     |
| 3381      | IBSP           | 1595    | 0.46           | 28.11       | Upregulation     |
| 283767    | GOLGA6L1       | 3822    | 0.01           | 0.6         | Upregulation     |
| 100631383 | FAM47E-STBD1   | 3060    | 0.01           | 0.53        | Upregulation     |
| 729540    | RGPD6          | 7640    | 0.01           | 0.5         | Upregulation     |
| 2615      | LRRC32         | 4222    | 0.02           | 0.99        | Upregulation     |
| 5744      | PTHLH          | 1473.62 | 0.57           | 25.45       | Upregulation     |
| 2769      | GNA15          | 2311    | 0.05           | 2.04        | Upregulation     |
| 11009     | IL24           | 1958.98 | 2.08           | 79.43       | Upregulation     |
| 374       | AREG           | 1290    | 1.32           | 43.11       | Upregulation     |
| 5743      | PTGS2          | 4507    | 26.17          | 811.17      | Upregulation     |
| 100302650 | BRE-AS1        | 1667    | 0.07           | 1.74        | Upregulation     |
| 1440      | CSF3           | 1598.45 | 1.86           | 43.39       | Upregulation     |
| 1960      | EGR3           | 4342    | 0.05           | 1.1         | Upregulation     |
| 64388     | GREM2          | 4199    | 0.4            | 8.56        | Upregulation     |
| 5617      | PRL            | 1147.36 | 0.1            | 2.05        | Upregulation     |
| 5168      | ENPP2          | 2370.19 | 0.23           | 4.52        | Upregulation     |
| 102724594 | U2AF1L5        | 989.82  | 0.37           | 5.74        | Upregulation     |
| 7130      | TNFAIP6        | 1439    | 43.74          | 662.71      | Upregulation     |
| 1959      | EGR2           | 2836.15 | 0.14           | 1.96        | Upregulation     |
| 387763    | C11orf96       | 1361    | 1.09           | 15.21       | Upregulation     |
| 4681      | NBL1           | 1997.85 | 3.62           | 49.93       | Upregulation     |
| 1880      | GPR183         | 1801    | 1.23           | 16.75       | Upregulation     |
| 1958      | EGR1           | 3136    | 6.31           | 84.07       | Upregulation     |
| 2262      | GPC5           | 2966    | 0.21           | 2.75        | Upregulation     |

|           |              |         |        |         |              |
|-----------|--------------|---------|--------|---------|--------------|
| 2560      | GABRB1       | 2226    | 0.09   | 1.09    | Upregulation |
| 3777      | KCNK3        | 3978    | 0.86   | 10.2    | Upregulation |
| 9214      | FCMR         | 2773    | 2.15   | 25.03   | Upregulation |
| 283208    | P4HA3        | 2299    | 0.6    | 6.8     | Upregulation |
| 3589      | IL11         | 2346.94 | 145.09 | 1531.65 | Upregulation |
| 1281      | COL3A1       | 5490    | 0.4    | 4.19    | Upregulation |
| 9066      | SYT7         | 6188    | 0.1    | 1.04    | Upregulation |
| 56936     | CCDC177      | 4179    | 0.17   | 1.75    | Upregulation |
| 100861555 | LINC00565    | 2494    | 0.08   | 0.8     | Upregulation |
| 5138      | PDE2A        | 4146    | 0.05   | 0.5     | Upregulation |
| 5270      | SERPINE2     | 2233.92 | 183.57 | 1775.76 | Upregulation |
| 2893      | GRIA4        | 4321.33 | 0.06   | 0.55    | Upregulation |
| 8738      | CRADD        | 1204.93 | 2.83   | 24.4    | Upregulation |
| 392232    | LOC392232    | 2626    | 0.28   | 2.4     | Upregulation |
| 3164      | NR4A1        | 2706.12 | 5.65   | 48.03   | Upregulation |
| 374946    | DRAXIN       | 1773    | 0.48   | 4.05    | Upregulation |
| 597       | BCL2A1       | 899.98  | 6.62   | 55.25   | Upregulation |
| 101929319 | LOC101929319 | 1880    | 0.25   | 2.06    | Upregulation |
| 613037    | LOC613037    | 3455    | 0.92   | 7.56    | Upregulation |
| 5798      | PTPRN        | 3603.77 | 0.67   | 5.36    | Upregulation |
| 100137049 | PLA2G4B      | 2752    | 1.34   | 10.58   | Upregulation |
| 650       | BMP2         | 3191    | 8.49   | 65.11   | Upregulation |
| 3579      | CXCR2        | 2672    | 1.78   | 13.59   | Upregulation |
| 2710      | GK           | 4560.23 | 1.64   | 12.47   | Upregulation |
| 8013      | NR4A3        | 5635    | 1.2    | 8.62    | Upregulation |
| 7056      | THBD         | 4048    | 1.06   | 7.6     | Upregulation |
| 2827      | GPR3         | 2149    | 0.64   | 4.01    | Upregulation |
| 2353      | FOS          | 2158    | 0.83   | 5.16    | Upregulation |
| 1116      | CHI3L1       | 1867    | 2.66   | 16.37   | Upregulation |
| 3484      | IGFBP1       | 1660    | 40.78  | 246.54  | Upregulation |
| 2494      | NR5A2        | 4922.99 | 0.13   | 0.76    | Upregulation |
| 55350     | VNN3         | 1736.18 | 1.35   | 7.84    | Upregulation |
| 1634      | DCN          | 4375.77 | 4.34   | 25.17   | Upregulation |
| 92162     | TMEM88       | 807.78  | 0.73   | 4.15    | Upregulation |
| 57556     | SEMA6A       | 6950    | 0.06   | 0.34    | Upregulation |
| 8942      | KYNU         | 1688.59 | 12.18  | 67.23   | Upregulation |
| 6909      | TBX2         | 3396    | 5.42   | 29.86   | Upregulation |
| 439965    | FAM35DP      | 3294    | 0.24   | 1.3     | Upregulation |
| 10736     | SIX2         | 2178    | 1.98   | 10.52   | Upregulation |
| 727751    | LOC727751    | 3054.73 | 0.58   | 3.07    | Upregulation |
| 2354      | FOSB         | 3766.03 | 0.61   | 3.16    | Upregulation |
| 441024    | MTHFD2L      | 2372    | 3.59   | 18.49   | Upregulation |
| 57761     | TRIB3        | 2294.49 | 4.99   | 25.44   | Upregulation |
| 58489     | ABHD17C      | 2408    | 11.39  | 56.94   | Upregulation |
| 9536      | PTGES        | 1787    | 38.25  | 182.84  | Upregulation |
| 147744    | TMEM190      | 593     | 1.67   | 7.98    | Upregulation |
| 28231     | SLCO4A1      | 2796    | 1.31   | 6.25    | Upregulation |
| 100529207 | RAD51L3-RFFL | 3904    | 0.33   | 1.56    | Upregulation |

|           |               |         |         |         |              |
|-----------|---------------|---------|---------|---------|--------------|
| 1645      | AKR1C1        | 1384    | 1.1     | 5.1     | Upregulation |
| 6364      | CCL20         | 849.77  | 15.94   | 72.03   | Upregulation |
| 23753     | SDF2L1        | 876     | 4.19    | 18.83   | Upregulation |
| 541472    | LOC541472     | 1374    | 0.7     | 3.09    | Upregulation |
| 3569      | IL6           | 1187.75 | 1015.77 | 4474.16 | Upregulation |
| 5452      | POU2F2        | 6261.58 | 2.91    | 12.71   | Upregulation |
| 6348      | CCL3          | 813     | 1.47    | 6.39    | Upregulation |
| 2921      | CXCL3         | 1166    | 63.05   | 274.01  | Upregulation |
| 1909      | EDNRA         | 3753.46 | 6.76    | 29.3    | Upregulation |
| 388       | RHOB          | 2387    | 55.02   | 238.11  | Upregulation |
| 8870      | IER3          | 1254    | 215.91  | 928.46  | Upregulation |
| 8325      | FZD8          | 3186    | 3.09    | 13.25   | Upregulation |
| 90226     | UCN2          | 1546    | 4.32    | 18.34   | Upregulation |
| 284021    | MILR1         | 1432.41 | 5.71    | 24.02   | Upregulation |
| 3976      | LIF           | 3980.93 | 39.04   | 164.07  | Upregulation |
| 3486      | IGFBP3        | 2620    | 176.23  | 737.68  | Upregulation |
| 7975      | MAFK          | 3350    | 21.42   | 88.52   | Upregulation |
| 622       | BDH1          | 3412.32 | 3.08    | 12.69   | Upregulation |
| 2919      | CXCL1         | 1184.05 | 192.92  | 792.35  | Upregulation |
| 4953      | ODC1          | 2060.59 | 62.32   | 255.32  | Upregulation |
| 5343      | PLGLB1        | 3011    | 0.43    | 1.75    | Upregulation |
| 2192      | FBLN1         | 2581.86 | 0.38    | 1.54    | Upregulation |
| 26207     | PITPNC1       | 6374.16 | 3.21    | 12.94   | Upregulation |
| 84557     | MAP1LC3A      | 1048    | 2.25    | 8.89    | Upregulation |
| 202915    | TMEM184A      | 6293    | 5.67    | 22.02   | Upregulation |
| 22999     | RIMS1         | 5006.32 | 0.28    | 1.08    | Upregulation |
| 10135     | NAMPT         | 4593    | 161.31  | 613.53  | Upregulation |
| 100132062 | LOC100132062  | 4370    | 1.71    | 6.42    | Upregulation |
| 6775      | STAT4         | 2793.95 | 3.18    | 11.91   | Upregulation |
| 7980      | TFPI2         | 2443.64 | 97.47   | 362.73  | Upregulation |
| 100534612 | C1QTNF3-AMACR | 3612    | 0.25    | 0.93    | Upregulation |
| 101929780 | NBPF25P       | 3827    | 1.91    | 7.09    | Upregulation |
| 101059953 | NPIPA8        | 1165    | 8.54    | 31.55   | Upregulation |
| 23193     | GANAB         | 3925.59 | 53.25   | 191.73  | Upregulation |
| 100128071 | FAM229A       | 716     | 1.52    | 5.47    | Upregulation |
| 51129     | ANGPTL4       | 1897.6  | 23      | 81.99   | Upregulation |
| 103625681 | LLPH-AS1      | 623     | 1.96    | 6.98    | Upregulation |
| 50486     | G0S2          | 978     | 496.66  | 1760.62 | Upregulation |
| 2920      | CXCL2         | 1234    | 56.56   | 200.32  | Upregulation |
| 171483    | FAM9B         | 2103    | 0.57    | 2       | Upregulation |
| 56892     | C8orf4        | 1841    | 0.75    | 2.63    | Upregulation |
| 6525      | SMTN          | 3329.24 | 13.26   | 46.31   | Upregulation |
| 53353     | LRP1B         | 16557   | 0.19    | 0.66    | Upregulation |
| 8767      | RIPK2         | 2588    | 15.69   | 54.34   | Upregulation |
| 734       | OSGIN2        | 4224.11 | 7.09    | 24.55   | Upregulation |
| 79993     | ELOVL7        | 3851    | 1.18    | 4.08    | Upregulation |
| 9595      | CYTIP         | 2282    | 5.94    | 20.52   | Upregulation |
| 1294      | COL7A1        | 9169    | 22.07   | 76.21   | Upregulation |

|           |               |         |        |         |              |
|-----------|---------------|---------|--------|---------|--------------|
| 253980    | KCTD13        | 1859.96 | 6.19   | 21.25   | Upregulation |
| 3552      | IL1A          | 2947    | 24.95  | 85.52   | Upregulation |
| 4929      | NR4A2         | 3546    | 21.87  | 74.72   | Upregulation |
| 100127888 | SLCO4A1-AS1   | 1440    | 0.88   | 2.94    | Upregulation |
| 2182      | ACSL4         | 5075.69 | 51.25  | 170.67  | Upregulation |
| 9071      | CLDN10        | 2490    | 2.14   | 7.12    | Upregulation |
| 728640    | FAM133CP      | 2520    | 0.77   | 2.54    | Upregulation |
| 768213    | MIR671        | 118     | 13.13  | 43.28   | Upregulation |
| 26580     | BSCL2         | 1746.89 | 3.08   | 10.08   | Upregulation |
| 3553      | IL1B          | 1498    | 149.85 | 490.11  | Upregulation |
| 10211     | FLOT1         | 2025.24 | 971.22 | 3176.13 | Upregulation |
| 65010     | SLC26A6       | 2522.47 | 17.13  | 55.94   | Upregulation |
| 4854      | NOTCH3        | 8089    | 0.69   | 2.25    | Upregulation |
| 390940    | PINLYP        | 938     | 13.77  | 44.81   | Upregulation |
| 7020      | TFAP2A        | 3508.21 | 10.04  | 32.5    | Upregulation |
| 101927599 | ZNF529-AS1    | 1193.64 | 1.57   | 5.06    | Upregulation |
| 56666     | PANX2         | 3066.87 | 4.09   | 13.16   | Upregulation |
| 3576      | CXCL8         | 1718    | 1737.3 | 5586.33 | Upregulation |
| 339344    | MYPOP         | 1909    | 4.14   | 13.3    | Upregulation |
| 283991    | UBALD2        | 1604    | 17.79  | 56.98   | Upregulation |
| 25764     | HYPK          | 1347.19 | 2.68   | 8.58    | Upregulation |
| 253982    | ASPHD1        | 1562    | 5.22   | 16.59   | Upregulation |
| 5122      | PCSK1         | 4824    | 0.26   | 0.82    | Upregulation |
| 23529     | CLCF1         | 1849.94 | 6.4    | 20.17   | Upregulation |
| 6372      | CXCL6         | 1677    | 5.36   | 16.88   | Upregulation |
| 9592      | IER2          | 2088    | 13.46  | 42.25   | Upregulation |
| 84879     | MFSD2A        | 2157.34 | 7.48   | 23.38   | Upregulation |
| 342897    | NCCRP1        | 1973    | 1.17   | 3.64    | Upregulation |
| 282974    | STK32C        | 872.44  | 2.77   | 8.53    | Upregulation |
| 10252     | SPRY1         | 2486.77 | 4.29   | 13.2    | Upregulation |
| 54498     | SMOX          | 2240.36 | 11.35  | 34.74   | Upregulation |
| 644019    | CBWD6         | 1719    | 0.83   | 2.53    | Upregulation |
| 255043    | TMEM86B       | 1751    | 1.33   | 4.04    | Upregulation |
| 100874014 | NAV2-AS2      | 853     | 1.9    | 5.69    | Upregulation |
| 3726      | JUNB          | 1832    | 46.79  | 139.77  | Upregulation |
| 100133331 | LOC100133331  | 4273    | 2.98   | 8.89    | Upregulation |
| 8681      | JMJD7-PLA2G4B | 3379    | 2.09   | 6.23    | Upregulation |
| 10360     | NPM3          | 904     | 4.17   | 12.39   | Upregulation |
| 2069      | EREG          | 4628    | 0.7    | 2.07    | Upregulation |
| 100289561 | LOC100289561  | 1056    | 1.73   | 5.1     | Upregulation |
| 445329    | SULT1A4       | 1397    | 4.28   | 12.53   | Upregulation |
| 9586      | CREB5         | 8061.89 | 1.3    | 3.8     | Upregulation |
| 100133091 | LOC100133091  | 2712    | 4.86   | 14.19   | Upregulation |
| 5321      | PLA2G4A       | 2886.5  | 4.77   | 13.88   | Upregulation |
| 283209    | PGM2L1        | 8513    | 4.39   | 12.74   | Upregulation |
| 386593    | CHKB-CPT1B    | 4293    | 2.07   | 6       | Upregulation |
| 4773      | NFATC2        | 6850    | 0.47   | 1.36    | Upregulation |
| 10309     | CCNO          | 1475.15 | 3.13   | 9.05    | Upregulation |



|           |              |         |         |         |              |
|-----------|--------------|---------|---------|---------|--------------|
| 402176    | RPL21P44     | 1797    | 1.35    | 3.9     | Upregulation |
| 145741    | C2CD4A       | 3461    | 1.01    | 2.91    | Upregulation |
| 84243     | ZDHHC18      | 3165    | 3.57    | 10.24   | Upregulation |
| 55151     | TMEM38B      | 3558    | 1.76    | 5.02    | Upregulation |
| 100874085 | NUCB1-AS1    | 433     | 6.78    | 19.28   | Upregulation |
| 604       | BCL6         | 3505.81 | 21.42   | 60.9    | Upregulation |
| 100529145 | TEN1-CDK3    | 3330    | 0.94    | 2.67    | Upregulation |
| 100137047 | JMJD7        | 1439    | 3.42    | 9.67    | Upregulation |
| 90865     | IL33         | 2488.66 | 6.49    | 18.33   | Upregulation |
| 51042     | ZNF593       | 653     | 6.71    | 18.94   | Upregulation |
| 3487      | IGFBP4       | 2246    | 21.54   | 60.41   | Upregulation |
| 100506124 | LOC100506124 | 1612    | 1.31    | 3.67    | Upregulation |
| 100289274 | DNAJC3-AS1   | 2908    | 0.94    | 2.63    | Upregulation |
| 10046     | MAMLD1       | 4531.76 | 5.55    | 15.51   | Upregulation |
| 23657     | SLC7A11      | 9648    | 10.18   | 28.36   | Upregulation |
| 272       | AMPD3        | 4230.65 | 8.95    | 24.78   | Upregulation |
| 27090     | ST6GALNAC4   | 1692.29 | 8.37    | 23.15   | Upregulation |
| 10586     | MAB21L2      | 2785    | 18.67   | 51.57   | Upregulation |
| 5101      | PCDH9        | 4698.64 | 0.66    | 1.82    | Upregulation |
| 93185     | IGSF8        | 2293.19 | 12.93   | 35.39   | Upregulation |
| 58472     | SQRDL        | 1874.69 | 52.09   | 142.15  | Upregulation |
| 7076      | TIMP1        | 931     | 182.96  | 497.59  | Upregulation |
| 113878    | DTX2         | 2635.52 | 12.58   | 34.17   | Upregulation |
| 64116     | SLC39A8      | 2870.52 | 33.14   | 90.01   | Upregulation |
| 11096     | ADAMTS5      | 9680    | 2.5     | 6.79    | Upregulation |
| 7291      | TWIST1       | 1669    | 9.19    | 24.87   | Upregulation |
| 94032     | CAMK2N2      | 1360    | 2.11    | 5.7     | Upregulation |
| 4502      | MT2A         | 466     | 1326.58 | 3583.55 | Upregulation |
| 55556     | ENOSF1       | 3797.04 | 9.49    | 25.6    | Upregulation |
| 64374     | SIL1         | 1910.13 | 14.92   | 40.14   | Upregulation |
| 56971     | CEACAM19     | 2264.04 | 13.97   | 37.48   | Upregulation |
| 8676      | STX11        | 5509    | 0.66    | 1.77    | Upregulation |
| 5218      | CDK14        | 4926.09 | 3.45    | 9.25    | Upregulation |
| 10525     | HYOU1        | 4546.93 | 51.41   | 137.39  | Upregulation |
| 2171      | FABP5        | 751     | 35.04   | 93.56   | Upregulation |
| 1803      | DPP4         | 3913    | 38.43   | 102.61  | Upregulation |
| 4857      | NOVA1        | 2391.22 | 15.28   | 40.41   | Upregulation |
| 100128252 | ZNF667-AS1   | 1513.44 | 3.2     | 8.46    | Upregulation |
| 3005      | HIF0         | 2336    | 5.67    | 14.96   | Upregulation |
| 100507588 | TGFBR3L      | 1256    | 2.12    | 5.59    | Upregulation |
| 80328     | ULBP2        | 1424    | 3.9     | 10.24   | Upregulation |
| 1514      | CTSL         | 1571.72 | 51.98   | 135.81  | Upregulation |
| 113189    | CHST14       | 2213    | 7.7     | 20.08   | Upregulation |
| 6781      | STC1         | 3897    | 168.37  | 438.61  | Upregulation |
| 7538      | ZFP36        | 1752    | 8.2     | 21.32   | Upregulation |
| 1491      | CTH          | 2070.27 | 1.28    | 3.32    | Upregulation |
| 84444     | DOT1L        | 7455    | 5.42    | 14.05   | Upregulation |
| 23213     | SULF1        | 5481.32 | 8.08    | 20.78   | Upregulation |

|           |           |         |        |        |              |
|-----------|-----------|---------|--------|--------|--------------|
| 132228    | LSMEM2    | 1583    | 2.21   | 5.68   | Upregulation |
| 123       | PLIN2     | 2029    | 41.17  | 105.62 | Upregulation |
| 80728     | ARHGAP39  | 4687.25 | 1.56   | 4      | Upregulation |
| 10954     | PDIA5     | 1866.27 | 9.69   | 24.68  | Upregulation |
| 92737     | DNER      | 3272    | 146.95 | 374.06 | Upregulation |
| 5396      | PRRX1     | 4031.1  | 9.12   | 23.17  | Upregulation |
| 4211      | MEIS1     | 3198    | 7.46   | 18.88  | Upregulation |
| 55630     | SLC39A4   | 705.15  | 5.01   | 12.67  | Upregulation |
| 51303     | FKBP11    | 807.92  | 10.1   | 25.45  | Upregulation |
| 100506714 | NUP50-AS1 | 1333.42 | 4.02   | 10.12  | Upregulation |
| 4494      | MT1F      | 465.15  | 10.08  | 25.33  | Upregulation |
| 27106     | ARRDC2    | 2529.94 | 7.25   | 18.19  | Upregulation |
| 55117     | SLC6A15   | 4676.09 | 6.53   | 16.37  | Upregulation |
| 27040     | LAT       | 1677    | 1.51   | 3.78   | Upregulation |
| 10459     | MAD2L2    | 1165.49 | 16.9   | 42.19  | Upregulation |
| 11174     | ADAMTS6   | 7289    | 3.87   | 9.64   | Upregulation |
| 8835      | SOCS2     | 2619.51 | 5.6    | 13.92  | Upregulation |
| 8110      | DPF3      | 3983.06 | 3.34   | 8.3    | Upregulation |
| 100506060 | SMG1P7    | 1891    | 1.76   | 4.37   | Upregulation |
| 9766      | SUSD6     | 5393    | 23.7   | 58.77  | Upregulation |
| 29107     | NXT1      | 1176    | 4.81   | 11.88  | Upregulation |
| 114899    | C1QTNF3   | 3624    | 0.62   | 1.53   | Upregulation |
| 338758    | LINC00936 | 2998    | 2.31   | 5.69   | Upregulation |
| 4783      | NFIL3     | 2101.64 | 14.02  | 34.52  | Upregulation |
| 7016      | TESK1     | 2520.45 | 7.59   | 18.68  | Upregulation |
| 64061     | TSPYL2    | 2833    | 17.83  | 43.71  | Upregulation |
| 399909    | PCNX3     | 6584    | 5.09   | 12.47  | Upregulation |
| 100302254 | MIR1282   | 101     | 64.16  | 156.98 | Upregulation |
| 644172    | LOC644172 | 1762    | 2.92   | 7.14   | Upregulation |
| 24146     | CLDN15    | 1816.86 | 2.45   | 5.98   | Upregulation |
| 3656      | IRAK2     | 3469    | 18.92  | 46.14  | Upregulation |
| 642846    | LOC642846 | 3514    | 0.87   | 2.12   | Upregulation |
| 112869    | SGF29     | 1160    | 5.83   | 14.2   | Upregulation |
| 57224     | NHSL1     | 7066.8  | 0.76   | 1.85   | Upregulation |
| 10019     | SH2B3     | 4661.85 | 30.14  | 73.23  | Upregulation |
| 55036     | CCDC40    | 3588.51 | 1.61   | 3.9    | Upregulation |
| 9601      | PDIA4     | 2970    | 58.51  | 141.69 | Upregulation |
| 2784      | GNB3      | 1760    | 6.84   | 16.55  | Upregulation |
| 9546      | APBA3     | 2158    | 4.88   | 11.79  | Upregulation |
| 51635     | DHRS7     | 1404    | 14.98  | 36.19  | Upregulation |
| 8848      | TSC22D1   | 3330.69 | 115.46 | 278.29 | Upregulation |
| 101927559 | CEBPB-AS1 | 2973    | 21.04  | 50.68  | Upregulation |
| 64849     | SLC13A3   | 4069.04 | 3.35   | 8.05   | Upregulation |
| 57476     | GRAMD1B   | 7636    | 2.73   | 6.56   | Upregulation |
| 25816     | TNFAIP8   | 2085.08 | 21.97  | 52.68  | Upregulation |
| 85450     | ITPRIP    | 6631.12 | 22.84  | 54.71  | Upregulation |
| 159686    | CFAP58    | 3313    | 0.82   | 1.96   | Upregulation |
| 220213    | OTUD1     | 3125    | 1.47   | 3.51   | Upregulation |

|           |                      |         |        |         |              |
|-----------|----------------------|---------|--------|---------|--------------|
| 53916     | RAB4B                | 1200    | 7.85   | 18.73   | Upregulation |
| 102800317 | LOC400927-<br>CSNK1E | 2997    | 2.22   | 5.29    | Upregulation |
| 525       | ATP6V1B1             | 1956    | 1.29   | 3.07    | Upregulation |
| 6158      | RPL28                | 1066.61 | 795.48 | 1887.26 | Upregulation |
| 8786      | RGS11                | 2407.54 | 1.16   | 2.75    | Upregulation |
| 91056     | AP5B1                | 6595    | 5.13   | 12.16   | Upregulation |
| 79897     | RPP21                | 565.59  | 8.99   | 21.29   | Upregulation |
| 3720      | JARID2               | 5780.78 | 7.5    | 17.75   | Upregulation |
| 84447     | SYVN1                | 3072.91 | 23.71  | 55.97   | Upregulation |
| 1051      | CEBPB                | 2113    | 98.26  | 231.9   | Upregulation |
| 3134      | HLA-F                | 1288.63 | 43.18  | 101.77  | Upregulation |
| 56605     | ERO1B                | 5070    | 2.61   | 6.12    | Upregulation |
| 7015      | TERT                 | 4018    | 3.79   | 8.87    | Upregulation |
| 146705    | ENTHD2               | 2308    | 4.55   | 10.64   | Upregulation |
| 11153     | FICD                 | 1651    | 3.59   | 8.38    | Upregulation |
| 27042     | DIEXF                | 8505    | 4.7    | 10.96   | Upregulation |
| 51073     | MRPL4                | 1545.93 | 13.13  | 30.53   | Upregulation |
| 7673      | ZNF222               | 1669.15 | 2.33   | 5.41    | Upregulation |
| 3439      | IFNA1                | 863     | 4.63   | 10.75   | Upregulation |
| 22932     | POMZP3               | 1430.97 | 4.18   | 9.68    | Upregulation |
| 26233     | FBXL6                | 1791.25 | 2.95   | 6.83    | Upregulation |
| 100506451 | RASSF8-AS1           | 966.64  | 7.92   | 18.33   | Upregulation |
| 90007     | MIDN                 | 3812    | 13.67  | 31.63   | Upregulation |
| 25973     | PARS2                | 2403    | 1.53   | 3.54    | Upregulation |
| 54923     | LIME1                | 1399.43 | 3.77   | 8.7     | Upregulation |
| 27071     | DAPP1                | 2982.04 | 1.25   | 2.88    | Upregulation |
| 399664    | MEX3D                | 2728.79 | 2.55   | 5.87    | Upregulation |
| 9718      | ECE2                 | 1027    | 2.72   | 6.26    | Upregulation |
| 8804      | CREG1                | 2048    | 3.65   | 8.37    | Upregulation |
| 55009     | C19orf24             | 912     | 8.86   | 20.3    | Upregulation |
| 53838     | C11orf24             | 2120    | 10.68  | 24.45   | Upregulation |
| 64788     | LMF1                 | 2620    | 1.8    | 4.12    | Upregulation |
| 4294      | MAP3K10              | 3453    | 4.42   | 10.1    | Upregulation |
| 7050      | TGIF1                | 1587.36 | 63.8   | 145.76  | Upregulation |
| 80761     | UPK3B                | 1620.57 | 2.12   | 4.84    | Upregulation |
| 51025     | PAM16                | 600     | 5.35   | 12.19   | Upregulation |
| 728130    | NUTM2D               | 5543    | 0.7    | 1.59    | Upregulation |
| 100170841 | C17orf96             | 3232    | 0.97   | 2.2     | Upregulation |
| 30850     | CDR2L                | 3546    | 6.4    | 14.48   | Upregulation |
| 64773     | PCED1A               | 1964.16 | 11.37  | 25.67   | Upregulation |
| 124976    | SPNS2                | 4349    | 1.75   | 3.95    | Upregulation |
| 23136     | EPB41L3              | 3959.42 | 32.43  | 73.16   | Upregulation |
| 10043     | TOM1                 | 2384.13 | 12.45  | 28.08   | Upregulation |
| 23223     | RRP12                | 4449    | 7.69   | 17.33   | Upregulation |
| 10076     | PTPRU                | 5598.83 | 4.24   | 9.55    | Upregulation |
| 124402    | UBALD1               | 1430    | 12.13  | 27.18   | Upregulation |
| 64208     | POPDC3               | 1479.5  | 3.45   | 7.73    | Upregulation |

|           |              |         |        |         |              |
|-----------|--------------|---------|--------|---------|--------------|
| 144097    | C11orf84     | 2055    | 11.22  | 25.13   | Upregulation |
| 83858     | ATAD3B       | 2605    | 4.77   | 10.68   | Upregulation |
| 116138    | KLHDC3       | 2029    | 17.19  | 38.48   | Upregulation |
| 7477      | WNT7B        | 3928    | 4.35   | 9.73    | Upregulation |
| 26470     | SEZ6L2       | 3425.66 | 42.79  | 95.39   | Upregulation |
| 388759    | C1orf229     | 2258    | 1.59   | 3.54    | Upregulation |
| 57214     | CEMIP        | 7130.95 | 86.05  | 191.52  | Upregulation |
| 3624      | INHBA        | 2175    | 94.43  | 209.73  | Upregulation |
| 84926     | SPRYD3       | 2949    | 6.75   | 14.97   | Upregulation |
| 54972     | TMEM132A     | 3518.52 | 80.04  | 177.17  | Upregulation |
| 84002     | B3GNT5       | 4131    | 1.92   | 4.24    | Upregulation |
| 27338     | UBE2S        | 1207    | 63.37  | 139.82  | Upregulation |
| 9945      | GFPT2        | 3115    | 9.78   | 21.55   | Upregulation |
| 1047      | CLGN         | 2744    | 33.24  | 73.15   | Upregulation |
| 10740     | RFPL1S       | 5125    | 0.6    | 1.32    | Upregulation |
| 118813    | ZFYVE27      | 2733.58 | 16.17  | 35.51   | Upregulation |
| 64118     | DUS1L        | 1904    | 15.73  | 34.52   | Upregulation |
| 101929532 | LOC101929532 | 3609    | 14.74  | 32.3    | Upregulation |
| 2669      | GEM          | 2139.43 | 7.09   | 15.53   | Upregulation |
| 4323      | MMP14        | 3610    | 494.69 | 1083.22 | Upregulation |
| 27079     | RPUSD2       | 2048.72 | 2.28   | 4.98    | Upregulation |
| 6520      | SLC3A2       | 1926.86 | 41.27  | 90.02   | Upregulation |
| 10549     | PRDX4        | 921     | 46.08  | 100.46  | Upregulation |
| 112970    | KTI12        | 1712    | 2.71   | 5.89    | Upregulation |
| 23645     | PPP1R15A     | 2399    | 29.16  | 63.32   | Upregulation |
| 25893     | TRIM58       | 5158    | 0.76   | 1.65    | Upregulation |
| 2888      | GRB14        | 2277.38 | 13.64  | 29.6    | Upregulation |
| 5971      | RELB         | 2297    | 13.09  | 28.38   | Upregulation |
| 2303      | FOXC2        | 1683    | 12.21  | 26.47   | Upregulation |
| 10572     | SIVA1        | 790     | 4.94   | 10.7    | Upregulation |
| 65249     | ZSWIM4       | 4339    | 5.48   | 11.86   | Upregulation |
| 6478      | SIAH2        | 2632    | 5.98   | 12.94   | Upregulation |
| 4814      | NINJ1        | 1297    | 69.68  | 150.65  | Upregulation |
| 117581    | TWIST2       | 1401.07 | 3.09   | 6.66    | Upregulation |
| 90317     | ZNF616       | 3070    | 1.1    | 2.37    | Upregulation |
| 84068     | SLC10A7      | 3811.51 | 2.3    | 4.95    | Upregulation |
| 81848     | SPRY4        | 4995.04 | 4.42   | 9.5     | Upregulation |
| 605       | BCL7A        | 3761.86 | 1.15   | 2.47    | Upregulation |
| 56257     | MEPCE        | 2676.46 | 16.6   | 35.65   | Upregulation |
| 166       | AES          | 1687.3  | 93.56  | 200.65  | Upregulation |
| 57026     | PDXP         | 2072    | 6.96   | 14.87   | Upregulation |
| 79856     | SNX22        | 3615.17 | 59.24  | 126.5   | Upregulation |
| 1604      | CD55         | 2101.99 | 62.06  | 132.47  | Upregulation |
| 415116    | PIM3         | 2410    | 13.51  | 28.82   | Upregulation |
| 100532735 | INO80B-WBP1  | 2112    | 11.94  | 25.45   | Upregulation |
| 90141     | EFCAB11      | 2804.88 | 3.36   | 7.16    | Upregulation |
| 654       | BMP6         | 3105    | 15.74  | 33.54   | Upregulation |
| 5187      | PER1         | 4717    | 4.53   | 9.65    | Upregulation |

|        |           |         |        |        |              |
|--------|-----------|---------|--------|--------|--------------|
| 4791   | NFKB2     | 3143.86 | 68.34  | 145.43 | Upregulation |
| 89927  | C16orf45  | 2232.78 | 10.26  | 21.83  | Upregulation |
| 57647  | DHX37     | 4568    | 2.85   | 6.06   | Upregulation |
| 7461   | CLIP2     | 5461.44 | 19.14  | 40.68  | Upregulation |
| 11054  | OGFR      | 2423    | 28     | 59.44  | Upregulation |
| 2296   | FOXC1     | 3452    | 2.6    | 5.51   | Upregulation |
| 694    | BTG1      | 4704    | 61.11  | 129.27 | Upregulation |
| 654364 | NME1-NME2 | 1095.97 | 6.66   | 14.08  | Upregulation |
| 126298 | IRGQ      | 9703    | 8.84   | 18.67  | Upregulation |
| 10514  | MYBBP1A   | 4344.62 | 8.81   | 18.56  | Upregulation |
| 50512  | PODXL2    | 2209    | 8.76   | 18.45  | Upregulation |
| 144717 | FAM109A   | 3168    | 1.24   | 2.61   | Upregulation |
| 1843   | DUSP1     | 2040    | 58.71  | 123.51 | Upregulation |
| 79174  | CRELD2    | 1456.2  | 15.44  | 32.46  | Upregulation |
| 10195  | ALG3      | 1556.58 | 14.01  | 29.43  | Upregulation |
| 133308 | SLC9B2    | 2820.21 | 1.82   | 3.82   | Upregulation |
| 55170  | PRMT6     | 2665    | 3.54   | 7.43   | Upregulation |
| 9846   | GAB2      | 6068.24 | 6.9    | 14.47  | Upregulation |
| 284040 | CDRT4     | 2515    | 7.93   | 16.63  | Upregulation |
| 11173  | ADAMTS7   | 5552    | 6.29   | 13.19  | Upregulation |
| 9120   | SLC16A6   | 3844.06 | 48.16  | 100.97 | Upregulation |
| 1646   | AKR1C2    | 2951.42 | 0.83   | 1.74   | Upregulation |
| 1649   | DDIT3     | 991.56  | 22.38  | 46.84  | Upregulation |
| 644096 | SDHAF1    | 1147    | 5.78   | 12.09  | Upregulation |
| 84844  | PHF5A     | 1105    | 12.39  | 25.91  | Upregulation |
| 121551 | BTBD11    | 4175.96 | 1.79   | 3.74   | Upregulation |
| 56905  | C15orf39  | 4443    | 6.67   | 13.93  | Upregulation |
| 54620  | FBXL19    | 3796.77 | 6.35   | 13.24  | Upregulation |
| 2643   | GCH1      | 2925.6  | 6.59   | 13.73  | Upregulation |
| 85302  | FBF1      | 4696    | 0.97   | 2.02   | Upregulation |
| 6415   | SEPW1     | 893     | 12.92  | 26.9   | Upregulation |
| 9275   | BCL7B     | 1754.39 | 13.64  | 28.39  | Upregulation |
| 8836   | GGH       | 1505    | 9.23   | 19.21  | Upregulation |
| 140885 | SIRPA     | 3883.22 | 26.11  | 54.31  | Upregulation |
| 5055   | SERPINB2  | 1924.17 | 223.13 | 464.08 | Upregulation |
| 7097   | TLR2      | 3601.02 | 1.54   | 3.2    | Upregulation |
| 842    | CASP9     | 2803.12 | 1.96   | 4.07   | Upregulation |
| 6583   | SLC22A4   | 2214    | 7.47   | 15.51  | Upregulation |
| 4595   | MUTYH     | 1892.44 | 2.74   | 5.68   | Upregulation |
| 221491 | C6orf1    | 1005.72 | 10.91  | 22.6   | Upregulation |
| 2043   | EPHA4     | 6407.84 | 6.83   | 14.14  | Upregulation |
| 221545 | C6orf136  | 1497.5  | 5.57   | 11.53  | Upregulation |
| 29952  | DPP7      | 1633    | 53.98  | 111.7  | Upregulation |
| 80148  | PQLC1     | 2512.05 | 4.5    | 9.31   | Upregulation |
| 84446  | BRSK1     | 3109    | 14.81  | 30.63  | Upregulation |
| 10482  | NXF1      | 3007.1  | 25.1   | 51.89  | Upregulation |
| 10082  | GPC6      | 7114    | 7.72   | 15.94  | Upregulation |
| 3570   | IL6R      | 4264.33 | 3.43   | 7.08   | Upregulation |

|           |              |         |         |         |                |
|-----------|--------------|---------|---------|---------|----------------|
| 80324     | PUS1         | 1700.51 | 3.94    | 8.13    | Upregulation   |
| 83667     | SESN2        | 3547    | 4.45    | 9.18    | Upregulation   |
| 3399      | ID3          | 1252    | 29.96   | 61.79   | Upregulation   |
| 1802      | DPH2         | 2328.85 | 4.7     | 9.69    | Upregulation   |
| 23184     | MESDC2       | 3539.28 | 11.37   | 23.41   | Upregulation   |
| 54910     | SEMA4C       | 3585    | 7.87    | 16.19   | Upregulation   |
| 1356      | CP           | 4273.7  | 4.13    | 8.49    | Upregulation   |
| 653268    | AGAP7P       | 2423    | 3.87    | 7.93    | Upregulation   |
| 387856    | CCDC184      | 2380    | 1.85    | 3.79    | Upregulation   |
| 23277     | CLUH         | 5252    | 7.76    | 15.89   | Upregulation   |
| 5886      | RAD23A       | 1797.09 | 52.85   | 108.15  | Upregulation   |
| 11228     | RASSF8       | 5545.45 | 61.33   | 125.47  | Upregulation   |
| 5034      | P4HB         | 2596    | 293.8   | 600.45  | Upregulation   |
| 8877      | SPHK1        | 1922.61 | 5.95    | 12.16   | Upregulation   |
| 84163     | GTF2IRD2     | 2280.4  | 5.3     | 10.81   | Upregulation   |
| 84221     | SPATC1L      | 1244.33 | 7.64    | 15.57   | Upregulation   |
| 3032      | HADHB        | 2196    | 37.19   | 75.69   | Upregulation   |
| 8875      | VNN2         | 1977.61 | 2.85    | 5.8     | Upregulation   |
| 84957     | RELT         | 3463.94 | 2.21    | 4.49    | Upregulation   |
| 29990     | PILRB        | 1438    | 15.48   | 31.4    | Upregulation   |
| 55022     | PID1         | 2637.81 | 41.57   | 84.28   | Upregulation   |
| 79581     | SLC52A2      | 1958.75 | 12.74   | 25.8    | Upregulation   |
| 22927     | HABP4        | 2681    | 4.38    | 8.87    | Upregulation   |
| 4157      | MC1R         | 3115    | 1.71    | 3.46    | Upregulation   |
| 5589      | PRKCSH       | 2114.9  | 118.29  | 239.2   | Upregulation   |
| 9704      | DHX34        | 4390    | 2.73    | 5.51    | Upregulation   |
| 8527      | DGKD         | 6236.92 | 6.48    | 13.05   | Upregulation   |
| 10817     | FRS3         | 2198    | 2.35    | 4.73    | Upregulation   |
| 8131      | NPRL3        | 2883.93 | 7.14    | 14.36   | Upregulation   |
| 51477     | ISYNA1       | 2129    | 1.99    | 4       | Upregulation   |
| 7873      | MANF         | 993     | 77.66   | 156.08  | Upregulation   |
| 9136      | RRP9         | 1590    | 5.13    | 10.31   | Upregulation   |
| 10957     | PNRC1        | 2133    | 33.11   | 66.53   | Upregulation   |
| 283871    | PGP          | 3136    | 3.51    | 7.05    | Upregulation   |
| 84080     | ENKD1        | 1628    | 6.5     | 13.05   | Upregulation   |
| 7866      | IFRD2        | 2129    | 6.03    | 12.1    | Upregulation   |
| 114987    | WDR31        | 4883.76 | 6.43    | 12.87   | Upregulation   |
| 3105      | HLA-A        | 1616.43 | 1188.18 | 2377.03 | Upregulation   |
| 92002     | FAM58A       | 1291.11 | 3.58    | 7.16    | Upregulation   |
| 196483    | EEF2KMT      | 2279.08 | 6.07    | 12.14   | Upregulation   |
| 284440    | LINC00663    | 2385    | 2.12    | 4.24    | Upregulation   |
| 8928      | FOXH1        | 2193    | 3.26    | 6.52    | Upregulation   |
| 100534592 | URGCP-MRPS24 | 838     | 4.81    | 0.01    | Downregulation |
| 728806    | NSFP1        | 587     | 2.72    | 0.01    | Downregulation |
| 5342      | PLGLB2       | 3016    | 2.48    | 0.01    | Downregulation |
| 727866    | FAM156B      | 1701    | 2.05    | 0.01    | Downregulation |
| 10170     | DHRS9        | 1741.3  | 2       | 0.01    | Downregulation |
| 100505865 | LINC00920    | 913     | 1.42    | 0.01    | Downregulation |

|           |                |         |       |      |                |
|-----------|----------------|---------|-------|------|----------------|
| 100526772 | TMEM110-MUSTN1 | 1459    | 1.2   | 0.01 | Downregulation |
| 202658    | TRIM39-RPP21   | 1567    | 1.2   | 0.01 | Downregulation |
| 103171574 | LOC103171574   | 1311    | 1.16  | 0.01 | Downregulation |
| 388436    | LOC388436      | 1735    | 1.09  | 0.01 | Downregulation |
| 440243    | GOLGA6L22      | 3806    | 0.9   | 0.01 | Downregulation |
| 554282    | FAM72C         | 2338    | 0.83  | 0.01 | Downregulation |
| 157570    | ESCO2          | 3376    | 0.81  | 0.01 | Downregulation |
| 101928994 | LOC101928994   | 1933    | 0.78  | 0.01 | Downregulation |
| 100529215 | ZNF559-ZNF177  | 2723.07 | 0.78  | 0.01 | Downregulation |
| 100533483 | DYX1C1-CCPG1   | 4838    | 0.71  | 0.01 | Downregulation |
| 150094    | SIK1           | 4706    | 0.69  | 0.01 | Downregulation |
| 1134      | CHRNA1         | 2019    | 0.68  | 0.01 | Downregulation |
| 286749    | STON1-GTF2A1L  | 3807.14 | 0.62  | 0.01 | Downregulation |
| 338382    | RAB7B          | 2955    | 0.57  | 0.01 | Downregulation |
| 2359      | FPR3           | 2643    | 0.48  | 0.01 | Downregulation |
| 57105     | CYSLTR2        | 2954    | 0.43  | 0.01 | Downregulation |
| 728047    | GOLGA80        | 5189    | 2.04  | 0.07 | Downregulation |
| 399844    | LINC01002      | 4874    | 0.26  | 0.01 | Downregulation |
| 22914     | KLRK1          | 1606    | 4.68  | 0.22 | Downregulation |
| 136853    | SSC4D          | 2806    | 3.03  | 0.15 | Downregulation |
| 632       | BGLAP          | 760     | 5.41  | 0.27 | Downregulation |
| 9075      | CLDN2          | 2932    | 0.79  | 0.04 | Downregulation |
| 80099     | C7orf69        | 679     | 3.14  | 0.16 | Downregulation |
| 6518      | SLC2A5         | 2454    | 0.77  | 0.04 | Downregulation |
| 2307      | FOXS1          | 1353    | 1.49  | 0.08 | Downregulation |
| 81849     | ST6GALNAC5     | 5110    | 0.37  | 0.02 | Downregulation |
| 100526739 | APITD1-CORT    | 1383    | 1.83  | 0.11 | Downregulation |
| 4605      | MYBL2          | 2713    | 0.62  | 0.04 | Downregulation |
| 195828    | ZNF367         | 3714    | 0.45  | 0.03 | Downregulation |
| 11262     | SP140          | 2928    | 1.2   | 0.08 | Downregulation |
| 5136      | PDE1A          | 3993.5  | 0.75  | 0.05 | Downregulation |
| 56256     | SERTAD4        | 2028    | 3.48  | 0.26 | Downregulation |
| 374462    | PTPRQ          | 8066    | 0.39  | 0.03 | Downregulation |
| 9582      | APOBEC3B       | 1485    | 2.02  | 0.16 | Downregulation |
| 5923      | RASGRF1        | 4860    | 0.47  | 0.04 | Downregulation |
| 5493      | PPL            | 6256    | 4.97  | 0.43 | Downregulation |
| 56062     | KLHL4          | 5880    | 2.88  | 0.25 | Downregulation |
| 57493     | HEG1           | 9156    | 97.29 | 8.54 | Downregulation |
| 5570      | PKIB           | 2012    | 14.34 | 1.26 | Downregulation |
| 114800    | CCDC85A        | 3983    | 0.89  | 0.08 | Downregulation |
| 29943     | PADI1          | 3847    | 0.54  | 0.05 | Downregulation |
| 653820    | FAM72B         | 1861    | 1.39  | 0.13 | Downregulation |
| 5028      | P2RY1          | 6802    | 0.95  | 0.09 | Downregulation |
| 10100     | TSPAN2         | 3143    | 0.73  | 0.07 | Downregulation |
| 6563      | SLC14A1        | 3930.3  | 30.02 | 2.93 | Downregulation |
| 29995     | LMCD1          | 1877.25 | 2.22  | 0.22 | Downregulation |
| 219790    | RTKN2          | 5840.47 | 2.34  | 0.24 | Downregulation |
| 58538     | MPP4           | 2475    | 4.5   | 0.47 | Downregulation |

|           |              |          |        |       |                |
|-----------|--------------|----------|--------|-------|----------------|
| 55872     | PBK          | 2102     | 2.67   | 0.3   | Downregulation |
| 55247     | NEIL3        | 2402     | 0.79   | 0.09  | Downregulation |
| 51704     | GPRC5B       | 2941     | 9.62   | 1.1   | Downregulation |
| 168507    | PKD1L1       | 9075     | 0.25   | 0.03  | Downregulation |
| 8436      | SDPR         | 3265     | 0.83   | 0.1   | Downregulation |
| 6326      | SCN2A        | 8571     | 1.16   | 0.14  | Downregulation |
| 100506498 | LOC100506498 | 1202     | 2.22   | 0.27  | Downregulation |
| 57082     | CASC5        | 7607     | 0.57   | 0.07  | Downregulation |
| 3952      | LEP          | 3444     | 0.65   | 0.08  | Downregulation |
| 100506621 | LINC01279    | 5176     | 28.62  | 3.61  | Downregulation |
| 8302      | KLRC4        | 928      | 2.72   | 0.35  | Downregulation |
| 10800     | CYSLTR1      | 2693     | 1.24   | 0.16  | Downregulation |
| 64220     | STRA6        | 2802     | 0.82   | 0.11  | Downregulation |
| 11130     | ZWINT        | 1546     | 2.01   | 0.27  | Downregulation |
| 1264      | CNN1         | 1646     | 1.41   | 0.19  | Downregulation |
| 283554    | GPR137C      | 3908     | 0.59   | 0.08  | Downregulation |
| 1288      | COL4A6       | 6552     | 0.44   | 0.06  | Downregulation |
| 643246    | MAP1LC3B2    | 832      | 2.38   | 0.33  | Downregulation |
| 221150    | SKA3         | 2808     | 1.36   | 0.19  | Downregulation |
| 51514     | DTL          | 4381     | 1.5    | 0.21  | Downregulation |
| 374897    | SBSN         | 1998     | 1.8    | 0.26  | Downregulation |
| 170688    | NUDT4P2      | 3838     | 2.12   | 0.31  | Downregulation |
| 9052      | GPRC5A       | 2856     | 37.22  | 5.55  | Downregulation |
| 84189     | SLITRK6      | 4199     | 0.67   | 0.1   | Downregulation |
| 4288      | MKI67        | 11715.37 | 4.81   | 0.72  | Downregulation |
| 283768    | GOLGA8G      | 5282     | 1.12   | 0.17  | Downregulation |
| 7272      | TTK          | 3010     | 2.3    | 0.35  | Downregulation |
| 400221    | FLJ22447     | 1386     | 5.06   | 0.77  | Downregulation |
| 10733     | PLK4         | 3693     | 1.31   | 0.2   | Downregulation |
| 9787      | DLGAP5       | 3035.14  | 2.21   | 0.34  | Downregulation |
| 730101    | LOC730101    | 3616.7   | 38.63  | 5.97  | Downregulation |
| 23555     | TSPAN15      | 1726     | 2.76   | 0.43  | Downregulation |
| 11346     | SYNPO        | 5329.26  | 8.05   | 1.26  | Downregulation |
| 287       | ANK2         | 7988     | 1.93   | 0.31  | Downregulation |
| 10721     | POLQ         | 8787     | 0.37   | 0.06  | Downregulation |
| 6319      | SCD          | 5473     | 72.75  | 11.86 | Downregulation |
| 81553     | FAM49A       | 4702     | 1.22   | 0.2   | Downregulation |
| 53844     | COPG2IT1     | 3463     | 17.18  | 2.83  | Downregulation |
| 6941      | TCF19        | 3060     | 1.03   | 0.17  | Downregulation |
| 100422558 | SMG1P6       | 3132     | 1.21   | 0.2   | Downregulation |
| 503637    | DUXAP8       | 2107     | 1.45   | 0.24  | Downregulation |
| 57484     | RNF150       | 4661     | 1.5    | 0.25  | Downregulation |
| 27063     | ANKRD1       | 1994     | 294.26 | 49.4  | Downregulation |
| 781       | CACNA2D1     | 7583     | 39.49  | 6.67  | Downregulation |
| 1296      | COL8A2       | 4397     | 1.1    | 0.19  | Downregulation |
| 2357      | FPR1         | 1334     | 6.81   | 1.19  | Downregulation |
| 115701    | ALPK2        | 7303     | 3.12   | 0.55  | Downregulation |



|           |              |         |        |       |                |
|-----------|--------------|---------|--------|-------|----------------|
| 4900      | NRGN         | 1235    | 3.88   | 0.69  | Downregulation |
| 51313     | FAM198B      | 4809    | 7.08   | 1.26  | Downregulation |
| 389336    | C5orf46      | 587     | 7.33   | 1.31  | Downregulation |
| 51512     | GTSE1        | 3128    | 2.07   | 0.37  | Downregulation |
| 4232      | MEST         | 2424.78 | 95.78  | 17.13 | Downregulation |
| 5137      | PDE1C        | 4431.9  | 10.45  | 1.9   | Downregulation |
| 10396     | ATP8A1       | 8225    | 0.82   | 0.15  | Downregulation |
| 288       | ANK3         | 9356    | 2.24   | 0.41  | Downregulation |
| 1301      | COL11A1      | 7291    | 8.4    | 1.54  | Downregulation |
| 5176      | SERPINF1     | 1552    | 1.84   | 0.34  | Downregulation |
| 283104    | SBF2-AS1     | 2708    | 25.8   | 4.83  | Downregulation |
| 8515      | ITGA10       | 5054.51 | 8.49   | 1.59  | Downregulation |
| 10148     | EBI3         | 1149    | 4.46   | 0.84  | Downregulation |
| 6241      | RRM2         | 3284    | 9.75   | 1.87  | Downregulation |
| 3791      | KDR          | 6055    | 2.24   | 0.43  | Downregulation |
| 84978     | FRMD5        | 5077    | 2.03   | 0.39  | Downregulation |
| 6274      | S100A3       | 738     | 4.57   | 0.88  | Downregulation |
| 9099      | USP2         | 2933    | 2.02   | 0.39  | Downregulation |
| 3823      | KLRC3        | 930.85  | 7.29   | 1.42  | Downregulation |
| 65061     | CDK15        | 3258.84 | 0.92   | 0.18  | Downregulation |
| 10112     | KIF20A       | 3471    | 2.29   | 0.45  | Downregulation |
| 25802     | LMOD1        | 3967    | 12.32  | 2.44  | Downregulation |
| 6328      | SCN3A        | 8994    | 1.21   | 0.24  | Downregulation |
| 103021295 | LOC103021295 | 464     | 7.71   | 1.53  | Downregulation |
| 55723     | ASF1B        | 1746    | 1.51   | 0.3   | Downregulation |
| 10769     | PLK2         | 2820.93 | 321.63 | 63.9  | Downregulation |
| 727936    | GXYLT2       | 1547    | 3.77   | 0.75  | Downregulation |
| 3822      | KLRC2        | 1223    | 14.7   | 2.94  | Downregulation |
| 306       | ANXA3        | 1634    | 22.92  | 4.59  | Downregulation |
| 9369      | NRXN3        | 8826.93 | 2.09   | 0.42  | Downregulation |
| 57650     | KIAA1524     | 4284    | 1.19   | 0.24  | Downregulation |
| 145508    | CEP128       | 4461    | 0.94   | 0.19  | Downregulation |
| 4645      | MYO5B        | 9520    | 0.69   | 0.14  | Downregulation |
| 1063      | CENPF        | 10316   | 3.77   | 0.77  | Downregulation |
| 143686    | SESN3        | 9443    | 0.93   | 0.19  | Downregulation |
| 388610    | TRNP1        | 1949    | 3.41   | 0.7   | Downregulation |
| 54538     | ROBO4        | 3653    | 1.12   | 0.23  | Downregulation |
| 1285      | COL4A3       | 8114    | 1.4    | 0.29  | Downregulation |
| 220965    | FAM13C       | 3336.73 | 2.1    | 0.44  | Downregulation |
| 57088     | PLSCR4       | 3208.97 | 14.56  | 3.09  | Downregulation |
| 151354    | FAM84A       | 6366    | 0.42   | 0.09  | Downregulation |
| 2491      | CENPI        | 3263    | 0.83   | 0.18  | Downregulation |
| 338596    | ST8SIA6      | 1398    | 2.81   | 0.61  | Downregulation |
| 51196     | PLCE1        | 6629.68 | 4.16   | 0.91  | Downregulation |
| 26024     | PTCD1        | 5505    | 2.95   | 0.65  | Downregulation |
| 387758    | FIBIN        | 3024    | 3.29   | 0.73  | Downregulation |
| 100874212 | MYCBP2-AS1   | 517     | 5.81   | 1.29  | Downregulation |
| 3730      | ANOS1        | 6314    | 6.53   | 1.45  | Downregulation |

|           |           |          |        |       |                |
|-----------|-----------|----------|--------|-------|----------------|
| 100507421 | TMEM178B  | 10558    | 0.63   | 0.14  | Downregulation |
| 1286      | COL4A4    | 10341    | 2.41   | 0.54  | Downregulation |
| 222696    | ZSCAN23   | 3178     | 0.89   | 0.2   | Downregulation |
| 7098      | TLR3      | 3057     | 2.88   | 0.65  | Downregulation |
| 5507      | PPP1R3C   | 2576     | 10.63  | 2.4   | Downregulation |
| 55304     | SPTLC3    | 3855     | 4.77   | 1.08  | Downregulation |
| 22998     | LIMCH1    | 5985.75  | 106.06 | 24.21 | Downregulation |
| 3352      | HTR1D     | 2857     | 14.13  | 3.24  | Downregulation |
| 8470      | SORBS2    | 4490.71  | 7.31   | 1.69  | Downregulation |
| 23551     | RASD2     | 3047     | 2.2    | 0.51  | Downregulation |
| 84561     | SLC12A8   | 3449     | 9.39   | 2.18  | Downregulation |
| 5318      | PKP2      | 4420.51  | 8.91   | 2.08  | Downregulation |
| 652       | BMP4      | 1873.83  | 53.6   | 12.6  | Downregulation |
| 113130    | CDCA5     | 2599     | 1.53   | 0.36  | Downregulation |
| 654342    | LOC654342 | 613      | 6.09   | 1.44  | Downregulation |
| 259232    | NALCN     | 6923     | 5.02   | 1.19  | Downregulation |
| 55165     | CEP55     | 2534     | 5.55   | 1.32  | Downregulation |
| 11004     | KIF2C     | 2799     | 3.91   | 0.93  | Downregulation |
| 259266    | ASPM      | 10578.74 | 2.06   | 0.49  | Downregulation |
| 63940     | GPSM3     | 1501     | 2.05   | 0.49  | Downregulation |
| 2195      | FAT1      | 14773    | 29.18  | 7.02  | Downregulation |
| 79026     | AHNAK     | 16526.76 | 61.51  | 14.91 | Downregulation |
| 64399     | HHIP      | 3555     | 14.88  | 3.61  | Downregulation |
| 1462      | VCAN      | 7737.81  | 407.28 | 98.98 | Downregulation |
| 983       | CDK1      | 1912.84  | 5.43   | 1.32  | Downregulation |
| 1382      | CRABP2    | 1088     | 13.62  | 3.34  | Downregulation |
| 1906      | EDN1      | 2109     | 5.69   | 1.4   | Downregulation |
| 7480      | WNT10B    | 2370     | 1.42   | 0.35  | Downregulation |
| 80144     | FRAS1     | 15643    | 3.21   | 0.8   | Downregulation |
| 100144602 | EPHA5-AS1 | 1198     | 4.28   | 1.07  | Downregulation |
| 57158     | JPH2      | 4301.61  | 1.36   | 0.34  | Downregulation |
| 8416      | ANXA9     | 1843     | 1.83   | 0.46  | Downregulation |
| 41        | ASIC1     | 3847.98  | 20.02  | 5.04  | Downregulation |
| 54704     | PDP1      | 4247     | 27.67  | 6.97  | Downregulation |
| 5414      | SEPT4     | 1679     | 2.23   | 0.57  | Downregulation |
| 25894     | PLEKHG4   | 4590.28  | 4.24   | 1.09  | Downregulation |
| 83540     | NUF2      | 1843     | 3.34   | 0.86  | Downregulation |
| 1824      | DSC2      | 5260     | 4.14   | 1.07  | Downregulation |
| 1836      | SLC26A2   | 8082     | 17.05  | 4.41  | Downregulation |
| 400966    | RGPD1     | 6711     | 0.73   | 0.19  | Downregulation |
| 57181     | SLC39A10  | 5337     | 17.05  | 4.44  | Downregulation |
| 643314    | KIAA0754  | 6979     | 7.13   | 1.86  | Downregulation |
| 1062      | CENPE     | 8267     | 0.92   | 0.24  | Downregulation |
| 5922      | RASA2     | 5647.2   | 35.71  | 9.37  | Downregulation |
| 100652770 | DSG2-AS1  | 2000     | 2.21   | 0.58  | Downregulation |
| 80312     | TET1      | 9601     | 0.8    | 0.21  | Downregulation |

|           |              |         |        |       |                |
|-----------|--------------|---------|--------|-------|----------------|
| 23500     | DAAM2        | 6191    | 2.74   | 0.72  | Downregulation |
| 5352      | PLOD2        | 4063.51 | 332.62 | 87.46 | Downregulation |
| 8869      | ST3GAL5      | 2262    | 8.6    | 2.27  | Downregulation |
| 55075     | UACA         | 6881.47 | 44.33  | 11.71 | Downregulation |
| 3866      | KRT15        | 1861    | 1.93   | 0.51  | Downregulation |
| 116028    | RMI2         | 1228    | 4.25   | 1.13  | Downregulation |
| 342184    | FMN1         | 12521   | 1.39   | 0.37  | Downregulation |
| 54762     | GRAMD1C      | 3770    | 5.15   | 1.38  | Downregulation |
| 4306      | NR3C2        | 5915    | 11.56  | 3.11  | Downregulation |
| 2044      | EPHA5        | 7560.34 | 7.11   | 1.92  | Downregulation |
| 51200     | CPA4         | 2817    | 94.57  | 25.68 | Downregulation |
| 170689    | ADAMTS15     | 5676    | 12.25  | 3.33  | Downregulation |
| 143872    | ARHGAP42     | 4752    | 1.03   | 0.28  | Downregulation |
| 9672      | SDC3         | 5121    | 13.86  | 3.78  | Downregulation |
| 116441    | TM4SF18      | 3731.14 | 6.85   | 1.87  | Downregulation |
| 5787      | PTPRB        | 10663   | 4.46   | 1.22  | Downregulation |
| 79801     | SHCBP1       | 3249    | 2.47   | 0.68  | Downregulation |
| 3161      | HMMR         | 3141.03 | 1.34   | 0.37  | Downregulation |
| 158471    | PRUNE2       | 5543.1  | 13.98  | 3.9   | Downregulation |
| 151887    | CCDC80       | 4711.81 | 131.42 | 36.73 | Downregulation |
| 10535     | RNASEH2A     | 1148    | 3.63   | 1.02  | Downregulation |
| 353189    | SLCO4C1      | 5334    | 0.96   | 0.27  | Downregulation |
| 9697      | TRAM2        | 7065    | 161.44 | 45.44 | Downregulation |
| 397       | ARHGDIB      | 1216    | 7.46   | 2.1   | Downregulation |
| 101927204 | LOC101927204 | 2247    | 2.59   | 0.73  | Downregulation |
| 100506835 | LINC00840    | 1974    | 9.24   | 2.62  | Downregulation |
| 653464    | SRGAP2C      | 3347    | 3.03   | 0.86  | Downregulation |
| 1903      | S1PR3        | 4404    | 21.38  | 6.07  | Downregulation |
| 4171      | MCM2         | 3504    | 3.13   | 0.89  | Downregulation |
| 3756      | KCNH1        | 8025    | 0.49   | 0.14  | Downregulation |
| 100271836 | SMG1P3       | 5052    | 4.19   | 1.2   | Downregulation |
| 165215    | FAM171B      | 3557    | 4.5    | 1.29  | Downregulation |
| 64359     | NXN          | 2742.04 | 13.98  | 4.03  | Downregulation |
| 4147      | MATN2        | 4178.13 | 6.98   | 2.02  | Downregulation |
| 10395     | DLC1         | 5908.7  | 20.33  | 5.89  | Downregulation |
| 29091     | STXBP6       | 3776    | 1.24   | 0.36  | Downregulation |
| 3433      | IFIT2        | 3505    | 58.61  | 17.04 | Downregulation |
| 341       | APOC1        | 464     | 11.57  | 3.38  | Downregulation |
| 301       | ANXA1        | 1556    | 104.85 | 30.73 | Downregulation |
| 3750      | KCND1        | 4720    | 3.84   | 1.13  | Downregulation |
| 55137     | FIGN         | 4535    | 1.63   | 0.48  | Downregulation |
| 81606     | LBH          | 2956    | 60.31  | 17.8  | Downregulation |
| 8727      | CTNNA1       | 2573    | 43.93  | 12.99 | Downregulation |
| 5357      | PLS1         | 3720    | 4.61   | 1.37  | Downregulation |
| 10635     | RAD51AP1     | 2218    | 2.22   | 0.66  | Downregulation |
| 8654      | PDE5A        | 6863.02 | 4.63   | 1.38  | Downregulation |
| 5947      | RBP1         | 963.04  | 37.3   | 11.14 | Downregulation |
| 84301     | DDI2         | 2680    | 2.24   | 0.67  | Downregulation |

|           |                |         |        |        |                |
|-----------|----------------|---------|--------|--------|----------------|
| 80380     | PDCD1LG2       | 2418    | 11.6   | 3.47   | Downregulation |
| 100381270 | ZBED6          | 2940    | 11.9   | 3.56   | Downregulation |
| 11098     | PRSS23         | 3669.78 | 340.15 | 102.11 | Downregulation |
| 171024    | SYNPO2         | 5755.14 | 1.56   | 0.47   | Downregulation |
| 100526836 | BLOC1S5-TXNDC5 | 3352    | 4.38   | 1.32   | Downregulation |
| 25890     | ABI3BP         | 4488    | 7.3    | 2.2    | Downregulation |
| 388886    | LRRC75B        | 1240    | 3.7    | 1.12   | Downregulation |
| 9076      | CLDN1          | 3452    | 39.83  | 12.07  | Downregulation |
| 554236    | DPY19L2P1      | 2827    | 2.57   | 0.78   | Downregulation |
| 57452     | GALNT16        | 3148    | 3.16   | 0.96   | Downregulation |
| 1117      | CHI3L2         | 1486    | 12.2   | 3.71   | Downregulation |
| 84803     | GPAT3          | 2640    | 2.07   | 0.63   | Downregulation |
| 3685      | ITGAV          | 6805.23 | 56.16  | 17.11  | Downregulation |
| 7083      | TK1            | 1616    | 2.55   | 0.78   | Downregulation |
| 6857      | SYT1           | 4517.62 | 32.53  | 9.96   | Downregulation |
| 56956     | LHX9           | 2515    | 1.63   | 0.5    | Downregulation |
| 151246    | SGO2           | 4029    | 1.43   | 0.44   | Downregulation |
| 101241892 | NPTN-IT1       | 2606    | 2.21   | 0.68   | Downregulation |
| 83593     | RASSF5         | 3531    | 1.62   | 0.5    | Downregulation |
| 26509     | MYOF           | 6859.48 | 113.8  | 35.18  | Downregulation |
| 1794      | DOCK2          | 6117    | 0.87   | 0.27   | Downregulation |
| 728554    | LOC728554      | 1827    | 3.24   | 1.01   | Downregulation |
| 65065     | NBEAL1         | 9058    | 1.7    | 0.53   | Downregulation |
| 80034     | CSRNP3         | 11687   | 0.64   | 0.2    | Downregulation |
| 169611    | OLFML2A        | 6307.21 | 28.21  | 8.83   | Downregulation |
| 79739     | TTLL7          | 3648    | 3.29   | 1.03   | Downregulation |
| 11010     | GLIPR1         | 3924    | 43.08  | 13.5   | Downregulation |
| 7006      | TEC            | 3620    | 1.18   | 0.37   | Downregulation |
| 785       | CACNB4         | 7793    | 1.37   | 0.43   | Downregulation |
| 100750246 | HIF1A-AS1      | 652     | 24.54  | 7.72   | Downregulation |
| 80010     | RMI1           | 3508    | 1.52   | 0.48   | Downregulation |
| 11113     | CIT            | 8708    | 1.96   | 0.62   | Downregulation |
| 27254     | CSDC2          | 2545    | 3.16   | 1      | Downregulation |
| 157285    | SGK223         | 4726    | 1.32   | 0.42   | Downregulation |
| 25837     | RAB26          | 1641    | 9.93   | 3.16   | Downregulation |
| 100132406 | NBPF10         | 10916   | 13.6   | 4.33   | Downregulation |
| 57514     | ARHGAP31       | 8096    | 3.14   | 1      | Downregulation |
| 386618    | KCTD4          | 2133    | 6.02   | 1.92   | Downregulation |
| 3690      | ITGB3          | 4894    | 0.94   | 0.3    | Downregulation |
| 701       | BUB1B          | 3749    | 1.47   | 0.47   | Downregulation |
| 9348      | NDST3          | 5961    | 0.78   | 0.25   | Downregulation |
| 51232     | CRIM1          | 5628    | 189.86 | 60.98  | Downregulation |
| 283234    | CCDC88B        | 4932    | 0.99   | 0.32   | Downregulation |
| 22874     | PLEKHA6        | 7434    | 2.53   | 0.82   | Downregulation |
| 3572      | IL6ST          | 8954.54 | 79.66  | 25.85  | Downregulation |
| 117248    | GALNT15        | 3626.36 | 5.53   | 1.8    | Downregulation |
| 79627     | OGFRL1         | 1755    | 35.76  | 11.66  | Downregulation |
| 23397     | NCAPH          | 5806    | 0.92   | 0.3    | Downregulation |

|           |              |         |        |        |                |
|-----------|--------------|---------|--------|--------|----------------|
| 6876      | TAGLN        | 1219.14 | 73.27  | 23.94  | Downregulation |
| 7039      | TGFA         | 4323.09 | 2.87   | 0.94   | Downregulation |
| 699       | BUB1         | 3562.96 | 3.19   | 1.05   | Downregulation |
| 64084     | CLSTN2       | 4882    | 19.68  | 6.48   | Downregulation |
| 5920      | RARRES3      | 779     | 32.88  | 10.85  | Downregulation |
| 54843     | SYTL2        | 2510.86 | 5.33   | 1.76   | Downregulation |
| 220979    | C10orf25     | 928     | 7.66   | 2.55   | Downregulation |
| 100532736 | MINOS1-NBL1  | 2071.85 | 26.63  | 8.87   | Downregulation |
| 64859     | NABP1        | 3610.62 | 18.3   | 6.1    | Downregulation |
| 27124     | INPP5J       | 3295.83 | 2.28   | 0.76   | Downregulation |
| 1647      | GADD45A      | 1336.85 | 29.65  | 9.93   | Downregulation |
| 30818     | KCNIP3       | 2735    | 9.47   | 3.18   | Downregulation |
| 9414      | TJP2         | 4625.8  | 7.27   | 2.45   | Downregulation |
| 114794    | ELFN2        | 8379    | 5.03   | 1.7    | Downregulation |
| 1953      | MEGF6        | 7450    | 20.99  | 7.12   | Downregulation |
| 2861      | GPR37        | 3815    | 1.12   | 0.38   | Downregulation |
| 54206     | ERRFI1       | 3144    | 73.77  | 25.17  | Downregulation |
| 29128     | UHRF1        | 4339    | 3.04   | 1.04   | Downregulation |
| 6095      | RORA         | 10998   | 0.76   | 0.26   | Downregulation |
| 90102     | PHLDB2       | 5934.89 | 27.85  | 9.55   | Downregulation |
| 57460     | PPM1H        | 6201    | 1.28   | 0.44   | Downregulation |
| 1756      | DMD          | 4591    | 4.42   | 1.52   | Downregulation |
| 631       | BFSP1        | 2200.28 | 2.35   | 0.81   | Downregulation |
| 100131315 | LOC100131315 | 585     | 15.84  | 5.46   | Downregulation |
| 51421     | AMOTL2       | 5004.54 | 49.99  | 17.26  | Downregulation |
| 84078     | KBTBD7       | 3008    | 2.54   | 0.88   | Downregulation |
| 26031     | OSBPL3       | 6464.75 | 12.8   | 4.44   | Downregulation |
| 115265    | DDIT4L       | 2649    | 2.85   | 0.99   | Downregulation |
| 22941     | SHANK2       | 8057.7  | 1.64   | 0.57   | Downregulation |
| 30061     | SLC40A1      | 3381    | 25.05  | 8.71   | Downregulation |
| 101929690 | LINC01583    | 2568    | 3.19   | 1.11   | Downregulation |
| 157638    | FAM84B       | 5503    | 6.35   | 2.21   | Downregulation |
| 805       | CALM2        | 1316.94 | 875.32 | 304.84 | Downregulation |
| 2589      | GALNT1       | 3852    | 151.27 | 52.69  | Downregulation |
| 79940     | LINC00472    | 9499.99 | 4.59   | 1.6    | Downregulation |
| 2304      | FOXE1        | 3473    | 8.19   | 2.86   | Downregulation |
| 7357      | UGCG         | 4028    | 226.57 | 79.39  | Downregulation |
| 8693      | GALNT4       | 5408    | 3.56   | 1.25   | Downregulation |
| 84832     | ANKRD36BP1   | 1879    | 3.52   | 1.24   | Downregulation |
| 4008      | LMO7         | 7234.77 | 35.8   | 12.62  | Downregulation |
| 26298     | EHF          | 5397    | 3.58   | 1.27   | Downregulation |
| 57523     | NYNRIN       | 7857    | 1.63   | 0.58   | Downregulation |
| 79899     | PRR5L        | 3856.29 | 7.08   | 2.52   | Downregulation |
| 23052     | ENDOD1       | 4693    | 8.22   | 2.93   | Downregulation |
| 8218      | CLTCL1       | 5484.24 | 5.32   | 1.9    | Downregulation |
| 23233     | EXOC6B       | 2594    | 7      | 2.5    | Downregulation |
| 2074      | ERCC6        | 7984.79 | 64.14  | 22.96  | Downregulation |
| 57697     | FANCM        | 7060    | 0.81   | 0.29   | Downregulation |

|           |              |          |        |       |                |
|-----------|--------------|----------|--------|-------|----------------|
| 414236    | C10orf55     | 2516     | 7.18   | 2.58  | Downregulation |
| 414260    | LINC00619    | 1131     | 11.81  | 4.25  | Downregulation |
| 4015      | LOX          | 4740.44  | 169.32 | 61.13 | Downregulation |
| 54947     | LPCAT2       | 5395     | 104.7  | 37.83 | Downregulation |
| 63979     | FIGNL1       | 3417.89  | 2.02   | 0.73  | Downregulation |
| 134       | ADORA1       | 2782     | 1.77   | 0.64  | Downregulation |
| 440823    | MIAT         | 10012.59 | 15.34  | 5.56  | Downregulation |
| 220594    | USP32P2      | 4859     | 2.81   | 1.02  | Downregulation |
| 5358      | PLS3         | 3390.84  | 101.2  | 36.8  | Downregulation |
| 8507      | ENC1         | 4484.15  | 8.74   | 3.18  | Downregulation |
| 100874207 | ST3GAL6-AS1  | 769      | 6.21   | 2.26  | Downregulation |
| 55166     | CENPQ        | 1753     | 3.62   | 1.32  | Downregulation |
| 222865    | TMEM130      | 2871.89  | 6.14   | 2.24  | Downregulation |
| 5740      | PTGIS        | 5603     | 6.74   | 2.46  | Downregulation |
| 147       | ADRA1B       | 2272     | 3.42   | 1.25  | Downregulation |
| 9493      | KIF23        | 3609.91  | 4.35   | 1.59  | Downregulation |
| 84620     | ST6GAL2      | 5091.18  | 3.58   | 1.31  | Downregulation |
| 646       | BNC1         | 4627     | 1.53   | 0.56  | Downregulation |
| 100294145 | LOC100294145 | 3668.27  | 3.66   | 1.34  | Downregulation |
| 93663     | ARHGAP18     | 3503     | 43.93  | 16.12 | Downregulation |
| 6414      | SEPP1        | 2252     | 2.15   | 0.79  | Downregulation |
| 1520      | CTSS         | 4107     | 16.57  | 6.09  | Downregulation |
| 84698     | CAPS2        | 3075.89  | 3.89   | 1.43  | Downregulation |
| 22836     | RHOBTB3      | 5566     | 52.72  | 19.4  | Downregulation |
| 130814    | PQLC3        | 1842.45  | 5.12   | 1.89  | Downregulation |
| 1734      | DIO2         | 6177.61  | 8.06   | 2.98  | Downregulation |
| 9928      | KIF14        | 6881     | 1.27   | 0.47  | Downregulation |
| 221091    | LRRN4CL      | 2600     | 4.35   | 1.61  | Downregulation |
| 152007    | GLIPR2       | 1952     | 5.22   | 1.94  | Downregulation |
| 254827    | NAALADL2     | 4912     | 1.21   | 0.45  | Downregulation |
| 55635     | DEPDC1       | 4607     | 1.45   | 0.54  | Downregulation |
| 134429    | STARD4       | 4213.02  | 28.1   | 10.47 | Downregulation |
| 83716     | CRISPLD2     | 4607     | 1.15   | 0.43  | Downregulation |
| 4012      | LNPEP        | 4404.43  | 5.8    | 2.18  | Downregulation |
| 4603      | MYBL1        | 5084.87  | 37.47  | 14.12 | Downregulation |
| 100288911 | LOC100288911 | 733      | 10.99  | 4.15  | Downregulation |
| 114902    | C1QTNF5      | 1361     | 4.74   | 1.79  | Downregulation |
| 340719    | NANOS1       | 4036     | 7.44   | 2.81  | Downregulation |
| 493       | ATP2B4       | 8766.61  | 50.28  | 19.01 | Downregulation |
| 8411      | EEA1         | 8019     | 5.13   | 1.94  | Downregulation |
| 79071     | ELOVL6       | 3210.45  | 12.7   | 4.82  | Downregulation |
| 3717      | JAK2         | 5285     | 7.78   | 2.96  | Downregulation |
| 8450      | CUL4B        | 5198     | 40.55  | 15.45 | Downregulation |
| 22974     | TPX2         | 3685     | 6.98   | 2.66  | Downregulation |
| 201562    | HACD2        | 1187     | 9.89   | 3.77  | Downregulation |
| 7402      | UTRN         | 12436    | 7.52   | 2.87  | Downregulation |
| 1287      | COL4A5       | 6523     | 48.16  | 18.41 | Downregulation |

|           |          |         |        |        |                |
|-----------|----------|---------|--------|--------|----------------|
| 5087      | PBX1     | 5817.64 | 22.22  | 8.51   | Downregulation |
| 1033      | CDKN3    | 906     | 7.73   | 2.97   | Downregulation |
| 3833      | KIFC1    | 2721    | 2.68   | 1.03   | Downregulation |
| 1122      | CHML     | 7082    | 3.3    | 1.27   | Downregulation |
| 83937     | RASSF4   | 2509    | 18.03  | 6.94   | Downregulation |
| 25780     | RASGRP3  | 4532.85 | 1.48   | 0.57   | Downregulation |
| 991       | CDC20    | 1697    | 4.05   | 1.56   | Downregulation |
| 162394    | SLFN5    | 4660    | 20.82  | 8.02   | Downregulation |
| 56944     | OLFML3   | 1890.35 | 7.37   | 2.84   | Downregulation |
| 5021      | OXTR     | 4361    | 7.68   | 2.96   | Downregulation |
| 11217     | AKAP2    | 6815    | 34.52  | 13.31  | Downregulation |
| 24137     | KIF4A    | 4504    | 1.27   | 0.49   | Downregulation |
| 27115     | PDE7B    | 5387    | 13.1   | 5.06   | Downregulation |
| 651746    | ANKRD33B | 9333    | 0.62   | 0.24   | Downregulation |
| 122953    | JDP2     | 3793    | 1.29   | 0.5    | Downregulation |
| 8490      | RGS5     | 5284.06 | 7.81   | 3.03   | Downregulation |
| 79646     | PANK3    | 3404    | 8.6    | 3.34   | Downregulation |
| 122786    | FRMD6    | 4504.22 | 43.15  | 16.77  | Downregulation |
| 10592     | SMC2     | 6030.96 | 5.53   | 2.15   | Downregulation |
| 220       | ALDH1A3  | 3508.21 | 73.08  | 28.42  | Downregulation |
| 83872     | HMCN1    | 18212   | 4.06   | 1.58   | Downregulation |
| 79054     | TRPM8    | 5621    | 1.64   | 0.64   | Downregulation |
| 105751187 | LRP1-AS  | 655     | 9.37   | 3.67   | Downregulation |
| 256691    | MAMDC2   | 3618    | 15.89  | 6.23   | Downregulation |
| 4001      | LMNB1    | 2621.72 | 5.19   | 2.04   | Downregulation |
| 389136    | VGLL3    | 8153.84 | 7.27   | 2.86   | Downregulation |
| 648       | BMI1     | 3435    | 7.64   | 3.02   | Downregulation |
| 51065     | RPS27L   | 1084    | 195.85 | 77.42  | Downregulation |
| 2744      | GLS      | 4702.31 | 35.96  | 14.22  | Downregulation |
| 100129792 | CCDC152  | 3491    | 3.54   | 1.4    | Downregulation |
| 3977      | LIFR     | 10107   | 2.4    | 0.95   | Downregulation |
| 2185      | PTK2B    | 4217.32 | 6.31   | 2.5    | Downregulation |
| 9223      | MAGI1    | 7062    | 4.87   | 1.93   | Downregulation |
| 106635534 | SNORA104 | 139     | 72.47  | 28.86  | Downregulation |
| 9249      | DHRS3    | 1653.79 | 27.83  | 11.12  | Downregulation |
| 64115     | C10orf54 | 4774    | 3.6    | 1.44   | Downregulation |
| 168667    | BMPER    | 5031    | 7.75   | 3.1    | Downregulation |
| 2202      | EFEMP1   | 3060.76 | 319.13 | 127.77 | Downregulation |
| 8460      | TPST1    | 2062    | 23.55  | 9.44   | Downregulation |
| 5129      | CDK18    | 3142.57 | 12.48  | 5.02   | Downregulation |
| 957       | ENTPD5   | 2064    | 2.65   | 1.07   | Downregulation |
| 4286      | MITF     | 4362.04 | 9.41   | 3.8    | Downregulation |
| 2633      | GBP1     | 3050    | 39.56  | 15.98  | Downregulation |
| 84969     | TOX2     | 2464.95 | 7.99   | 3.23   | Downregulation |
| 144100    | PLEKHA7  | 4820    | 3.14   | 1.27   | Downregulation |
| 84665     | MYPN     | 5183.92 | 1.38   | 0.56   | Downregulation |
| 2674      | GFRA1    | 9155.96 | 1.6    | 0.65   | Downregulation |
| 284       | ANGPT1   | 3804.18 | 8.32   | 3.38   | Downregulation |

|           |              |          |        |       |                |
|-----------|--------------|----------|--------|-------|----------------|
| 2825      | GPR1         | 2168     | 4.97   | 2.02  | Downregulation |
| 3887      | KRT81        | 1926     | 20.32  | 8.26  | Downregulation |
| 91584     | PLXNA4       | 11890.49 | 30.04  | 12.23 | Downregulation |
| 112479    | ERI2         | 3529     | 2.97   | 1.21  | Downregulation |
| 54507     | ADAMTSL4     | 4001.58  | 8.88   | 3.62  | Downregulation |
| 22807     | IKZF2        | 9512     | 2.03   | 0.83  | Downregulation |
| 2823      | GPM6A        | 3152.19  | 2.2    | 0.9   | Downregulation |
| 857       | CAV1         | 2556.58  | 100.39 | 41.08 | Downregulation |
| 26471     | NUPR1        | 888.19   | 39.92  | 16.38 | Downregulation |
| 10905     | MAN1A2       | 5388     | 9.8    | 4.04  | Downregulation |
| 117854    | TRIM6        | 3037.16  | 6.86   | 2.83  | Downregulation |
| 4739      | NEDD9        | 3948.91  | 8.5    | 3.51  | Downregulation |
| 101928936 | LOC101928936 | 3974     | 2.88   | 1.19  | Downregulation |
| 5985      | RFC5         | 2242.78  | 3.84   | 1.59  | Downregulation |
| 3875      | KRT18        | 1458.5   | 204.29 | 84.79 | Downregulation |
| 22837     | COBLL1       | 9374     | 1.18   | 0.49  | Downregulation |
| 27143     | PALD1        | 4601     | 1.9    | 0.79  | Downregulation |
| 344148    | NCKAP5       | 7611     | 6.13   | 2.55  | Downregulation |
| 1183      | CLCN4        | 6660.17  | 3.94   | 1.64  | Downregulation |
| 201134    | CEP112       | 3449     | 3.48   | 1.45  | Downregulation |
| 154091    | SLC2A12      | 5599     | 9.13   | 3.81  | Downregulation |
| 139886    | SPIN4        | 4112     | 1.7    | 0.71  | Downregulation |
| 9464      | HAND2        | 2368     | 4.66   | 1.95  | Downregulation |
| 4921      | DDR2         | 3172     | 18.33  | 7.68  | Downregulation |
| 112597    | LINC00152    | 520.65   | 72.85  | 30.53 | Downregulation |
| 376267    | RAB15        | 3284     | 1.98   | 0.83  | Downregulation |
| 57211     | ADGRG6       | 6896     | 4.04   | 1.7   | Downregulation |
| 221079    | ARL5B        | 3589     | 6.61   | 2.79  | Downregulation |
| 84913     | ATOH8        | 5873     | 16.79  | 7.1   | Downregulation |
| 29915     | HCFC2        | 5743     | 3.28   | 1.39  | Downregulation |
| 23179     | RGL1         | 4804.59  | 15.54  | 6.59  | Downregulation |
| 10232     | MSLN         | 2127     | 4.43   | 1.88  | Downregulation |
| 54622     | ARL15        | 2501     | 4.24   | 1.8   | Downregulation |
| 9882      | TBC1D4       | 6282.92  | 8.4    | 3.57  | Downregulation |
| 100507487 | LOC100507487 | 2081     | 3.69   | 1.57  | Downregulation |
| 26353     | HSPB8        | 2056     | 5.17   | 2.2   | Downregulation |
| 10234     | LRRC17       | 2250     | 38.81  | 16.52 | Downregulation |
| 8424      | BBOX1        | 1901     | 13.26  | 5.65  | Downregulation |
| 117583    | PARD3B       | 7982.16  | 6.43   | 2.74  | Downregulation |
| 50807     | ASAP1        | 6263.52  | 53.67  | 22.88 | Downregulation |
| 1112      | FOXN3        | 7856     | 6.66   | 2.84  | Downregulation |
| 8322      | FZD4         | 7394     | 12.25  | 5.23  | Downregulation |
| 144811    | LACC1        | 4124     | 7.82   | 3.34  | Downregulation |
| 6519      | SLC3A1       | 2353     | 5.94   | 2.54  | Downregulation |
| 100302739 | PCNA-AS1     | 384      | 33.34  | 14.27 | Downregulation |
| 4085      | MAD2L1       | 1453     | 5.11   | 2.19  | Downregulation |
| 154664    | ABCA13       | 17207    | 1.54   | 0.66  | Downregulation |



|        |          |              |        |       |                |
|--------|----------|--------------|--------|-------|----------------|
| 57381  | RHOJ     | 3619         | 6.53   | 2.8   | Downregulation |
| 2150   | F2RL1    | 2883         | 3.59   | 1.54  | Downregulation |
| 8743   | TNFSF10  | 1876.19      | 3.38   | 1.45  | Downregulation |
| 135228 | CD109    | 9073.98      | 13.89  | 5.96  | Downregulation |
| 63926  | ANKEF1   | 3829         | 3.61   | 1.55  | Downregulation |
| 51474  | LIMA1    | 3582.78      | 53.4   | 22.93 | Downregulation |
| 83660  | TLN2     | 11650        | 4.12   | 1.77  | Downregulation |
| 59269  | HIVEP3   | 11269.0<br>1 | 2.7    | 1.16  | Downregulation |
| 80319  | CXXC4    | 5104.72      | 4.79   | 2.06  | Downregulation |
| 891    | CCNB1    | 2177         | 3.58   | 1.54  | Downregulation |
| 254228 | FAM26E   | 3556         | 3.23   | 1.39  | Downregulation |
| 254778 | C8orf46  | 3471         | 1.81   | 0.78  | Downregulation |
| 182    | JAG1     | 5988         | 5.91   | 2.55  | Downregulation |
| 7049   | TGFBR3   | 6572         | 1.83   | 0.79  | Downregulation |
| 2898   | GRIK2    | 4716.91      | 4.14   | 1.79  | Downregulation |
| 7164   | TPD52L1  | 2230.59      | 13.12  | 5.68  | Downregulation |
| 8821   | INPP4B   | 4041         | 6.3    | 2.73  | Downregulation |
| 619207 | SCART1   | 4900         | 1.43   | 0.62  | Downregulation |
| 11145  | PLA2G16  | 1266.13      | 30.97  | 13.44 | Downregulation |
| 26586  | CKAP2    | 3647.73      | 14.3   | 6.21  | Downregulation |
| 7048   | TGFBR2   | 4654.16      | 93.94  | 40.86 | Downregulation |
| 9462   | RASAL2   | 9988.05      | 7.7    | 3.35  | Downregulation |
| 6622   | SNCA     | 3190.2       | 11.27  | 4.91  | Downregulation |
| 91614  | DEPDC7   | 1774         | 6.01   | 2.62  | Downregulation |
| 55103  | RALGPS2  | 7526         | 8.14   | 3.55  | Downregulation |
| 7003   | TEAD1    | 9433         | 28.06  | 12.24 | Downregulation |
| 4810   | NHS      | 8181         | 4.24   | 1.85  | Downregulation |
| 1755   | DMBT1    | 7303.26      | 1.76   | 0.77  | Downregulation |
| 9020   | MAP3K14  | 4499         | 9.53   | 4.17  | Downregulation |
| 80014  | WWC2     | 8822         | 8.27   | 3.62  | Downregulation |
| 595135 | PGM5P2   | 1976         | 7.72   | 3.38  | Downregulation |
| 27350  | APOBEC3C | 1127         | 14.66  | 6.47  | Downregulation |
| 57507  | ZNF608   | 5645         | 4.21   | 1.86  | Downregulation |
| 3691   | ITGB4    | 5742.31      | 3.44   | 1.52  | Downregulation |
| 8564   | KMO      | 5266         | 10.25  | 4.54  | Downregulation |
| 824    | CAPN2    | 3391.27      | 131.85 | 58.4  | Downregulation |
| 2305   | FOXM1    | 3590.88      | 6.49   | 2.88  | Downregulation |
| 64750  | SMURF2   | 3866         | 28.06  | 12.49 | Downregulation |
| 91351  | DDX60L   | 6767.74      | 26.49  | 11.8  | Downregulation |
| 55582  | KIF27    | 4640.54      | 2.89   | 1.29  | Downregulation |
| 80205  | CHD9     | 11482        | 10.5   | 4.69  | Downregulation |
| 401548 | SNX30    | 7616         | 5.57   | 2.49  | Downregulation |
| 55703  | POLR3B   | 4238.04      | 4.39   | 1.97  | Downregulation |
| 6498   | SKIL     | 7002.34      | 20.58  | 9.25  | Downregulation |
| 57724  | EPG5     | 12715        | 8.29   | 3.73  | Downregulation |
| 23576  | DDAH1    | 3997.68      | 37.77  | 17.03 | Downregulation |
| 114294 | LACTB    | 2349.12      | 35.03  | 15.82 | Downregulation |

|           |           |          |        |       |                |
|-----------|-----------|----------|--------|-------|----------------|
| 9603      | NFE2L3    | 3720     | 24.83  | 11.22 | Downregulation |
| 8853      | ASAP2     | 5631.4   | 38.2   | 17.27 | Downregulation |
| 166929    | SGMS2     | 5994.86  | 7.83   | 3.54  | Downregulation |
| 340075    | ARSI      | 3225     | 2.3    | 1.04  | Downregulation |
| 79618     | HMBOX1    | 3175     | 2.41   | 1.09  | Downregulation |
| 4750      | NEK1      | 5542.48  | 6.34   | 2.87  | Downregulation |
| 25805     | BAMBI     | 1732     | 27.76  | 12.61 | Downregulation |
| 8085      | MLL2      | 19432    | 17.71  | 8.05  | Downregulation |
| 80830     | APOL6     | 10156    | 10.41  | 4.73  | Downregulation |
| 3832      | KIF11     | 5101     | 4.29   | 1.95  | Downregulation |
| 79633     | FAT4      | 16117.74 | 6.57   | 2.99  | Downregulation |
| 8706      | B3GALNT1  | 3269     | 4.54   | 2.07  | Downregulation |
| 7052      | TGM2      | 3930.57  | 685.11 | 312.6 | Downregulation |
| 22871     | NLGN1     | 4947     | 2.76   | 1.26  | Downregulation |
| 50484     | RRM2B     | 4801.91  | 22.09  | 10.1  | Downregulation |
| 116966    | WDR17     | 7438.08  | 2.01   | 0.92  | Downregulation |
| 51203     | NUSAP1    | 2469.47  | 6.68   | 3.06  | Downregulation |
| 134430    | WDR36     | 6611     | 13.49  | 6.18  | Downregulation |
| 51762     | RAB8B     | 4877     | 18.64  | 8.54  | Downregulation |
| 23180     | RFTN1     | 3033     | 17.37  | 7.96  | Downregulation |
| 6331      | SCN5A     | 8390.02  | 14.38  | 6.59  | Downregulation |
| 54677     | CROT      | 3045.68  | 6.27   | 2.88  | Downregulation |
| 3157      | HMGCS1    | 5412.59  | 10.42  | 4.79  | Downregulation |
| 6272      | SORT1     | 7038     | 23.73  | 10.91 | Downregulation |
| 23405     | DICER1    | 10205.94 | 7.58   | 3.49  | Downregulation |
| 440672    | NUDT4P1   | 3802     | 22.14  | 10.2  | Downregulation |
| 4320      | MMP11     | 2306     | 10.48  | 4.83  | Downregulation |
| 647979    | NORAD     | 5378     | 98.11  | 45.25 | Downregulation |
| 26289     | AK5       | 3334.46  | 24.24  | 11.18 | Downregulation |
| 8313      | AXIN2     | 4241     | 2.71   | 1.25  | Downregulation |
| 80114     | BICC1     | 5486     | 47.23  | 21.8  | Downregulation |
| 100996712 | SRGAP2D   | 3046     | 5.89   | 2.72  | Downregulation |
| 374383    | NCR3LG1   | 6382     | 1.71   | 0.79  | Downregulation |
| 11080     | DNAJB4    | 2978.82  | 17.55  | 8.11  | Downregulation |
| 8601      | RGS20     | 1520     | 13.11  | 6.06  | Downregulation |
| 3655      | ITGA6     | 5615.16  | 10.27  | 4.76  | Downregulation |
| 644873    | LINC01184 | 2977     | 2.5    | 1.16  | Downregulation |
| 11103     | KRR1      | 3357     | 29.78  | 13.82 | Downregulation |
| 10499     | NCOA2     | 6157     | 4.65   | 2.16  | Downregulation |
| 10085     | EDIL3     | 4751.96  | 83.44  | 38.8  | Downregulation |
| 3953      | LEPR      | 4636.21  | 13.76  | 6.4   | Downregulation |
| 6335      | SCN9A     | 9771     | 3.59   | 1.67  | Downregulation |
| 11169     | WDHD1     | 6054     | 1.59   | 0.74  | Downregulation |
| 100775107 | RBM5-AS1  | 1386     | 15.27  | 7.11  | Downregulation |
| 4214      | MAP3K1    | 7522     | 1.35   | 0.63  | Downregulation |
| 92691     | TMEM169   | 3387.01  | 6.64   | 3.1   | Downregulation |

|        |           |         |         |        |                |
|--------|-----------|---------|---------|--------|----------------|
| 55568  | GALNT10   | 5966    | 62.9    | 29.38  | Downregulation |
| 57684  | ZBTB26    | 2008    | 4.04    | 1.89   | Downregulation |
| 27314  | RAB30     | 9886.18 | 4.27    | 2      | Downregulation |
| 5915   | RARB      | 2916.03 | 9.35    | 4.38   | Downregulation |
| 94241  | TP53INP1  | 5628    | 12.11   | 5.69   | Downregulation |
| 54542  | RC3H2     | 3941.95 | 10.53   | 4.95   | Downregulation |
| 9397   | NMT2      | 3859.64 | 25.65   | 12.06  | Downregulation |
| 51053  | GMNN      | 1193.19 | 10.44   | 4.91   | Downregulation |
| 79628  | SH3TC2    | 26588   | 0.34    | 0.16   | Downregulation |
| 5581   | PRKCE     | 5537    | 3.46    | 1.63   | Downregulation |
| 302    | ANXA2     | 1564.34 | 1477.99 | 696.43 | Downregulation |
| 9735   | KNTC1     | 6965    | 2.27    | 1.07   | Downregulation |
| 25758  | KIAA1549L | 11640   | 4.05    | 1.91   | Downregulation |
| 113146 | AHNAK2    | 18317   | 14.22   | 6.71   | Downregulation |
| 9014   | TAF1B     | 2280.21 | 6.82    | 3.22   | Downregulation |
| 54874  | FNBP1L    | 4567.16 | 12.6    | 5.95   | Downregulation |
| 79776  | ZFHX4     | 13975   | 5.08    | 2.4    | Downregulation |
| 3037   | HAS2      | 3275    | 2.62    | 1.24   | Downregulation |
| 5565   | PRKAB2    | 5432.52 | 5.26    | 2.49   | Downregulation |
| 115    | ADCY9     | 7741    | 4.16    | 1.97   | Downregulation |
| 900    | CCNG1     | 2400.1  | 81.19   | 38.51  | Downregulation |
| 79158  | GNPTAB    | 5644    | 19.56   | 9.28   | Downregulation |
| 160518 | DENND5B   | 9459.93 | 7.31    | 3.47   | Downregulation |
| 5205   | ATP8B1    | 5949    | 20.85   | 9.91   | Downregulation |
| 113612 | CYP2U1    | 4760    | 8.52    | 4.05   | Downregulation |
| 27327  | TNRC6A    | 8438    | 22.63   | 10.77  | Downregulation |
| 440138 | ALG11     | 2595    | 3.78    | 1.8    | Downregulation |
| 84295  | PHF6      | 4442    | 10.94   | 5.21   | Downregulation |
| 860    | RUNX2     | 5282.35 | 25.88   | 12.33  | Downregulation |
| 84740  | AFAP1-AS1 | 6810    | 1.95    | 0.93   | Downregulation |
| 10873  | ME3       | 2130.15 | 28.66   | 13.67  | Downregulation |
| 23677  | SH3BP4    | 5193    | 54.99   | 26.25  | Downregulation |
| 9415   | FADS2     | 3162.69 | 51.15   | 24.42  | Downregulation |
| 1787   | TRDMT1    | 7687    | 1.36    | 0.65   | Downregulation |
| 142940 | TRUB1     | 3412    | 12.93   | 6.18   | Downregulation |
| 148534 | TMEM56    | 6908.68 | 3.7     | 1.77   | Downregulation |
| 1955   | MEGF9     | 6227    | 52.27   | 25.01  | Downregulation |
| 23089  | PEG10     | 6634.49 | 18.66   | 8.93   | Downregulation |
| 10501  | SEMA6B    | 3961    | 6.43    | 3.08   | Downregulation |
| 9585   | KIF20B    | 6339    | 3.15    | 1.51   | Downregulation |
| 26507  | CNNM1     | 5988    | 5.15    | 2.47   | Downregulation |
| 54790  | TET2      | 9741.56 | 7.19    | 3.45   | Downregulation |
| 92370  | PXYLP1    | 3281    | 7.44    | 3.57   | Downregulation |
| 1829   | DSG2      | 5885    | 33.44   | 16.05  | Downregulation |
| 6470   | SHMT1     | 2469.8  | 6.37    | 3.06   | Downregulation |
| 154214 | RNF217    | 4722.86 | 10.05   | 4.83   | Downregulation |
| 23612  | PHLDA3    | 1855.73 | 39.48   | 18.99  | Downregulation |
| 50937  | CDON      | 8051    | 3.28    | 1.58   | Downregulation |

|           |              |          |        |        |                |
|-----------|--------------|----------|--------|--------|----------------|
| 1073      | CFL2         | 3101.55  | 40.73  | 19.62  | Downregulation |
| 9127      | P2RX6        | 2754     | 4.4    | 2.12   | Downregulation |
| 387882    | C12orf75     | 1383     | 63.38  | 30.54  | Downregulation |
| 374354    | NHLRC2       | 6409     | 6.76   | 3.26   | Downregulation |
| 25939     | SAMHD1       | 3189     | 56.71  | 27.4   | Downregulation |
| 23092     | ARHGAP26     | 8876     | 3.99   | 1.93   | Downregulation |
| 1612      | DAPK1        | 5781.63  | 29.25  | 14.17  | Downregulation |
| 728730    | LOC728730    | 2517     | 4.21   | 2.04   | Downregulation |
| 5983      | RFC3         | 2205.62  | 3.24   | 1.57   | Downregulation |
| 401474    | SAMD12       | 8799     | 3.69   | 1.79   | Downregulation |
| 163486    | DENND1B      | 6706.55  | 5.17   | 2.51   | Downregulation |
| 1657      | DMXL1        | 11694.78 | 5.17   | 2.51   | Downregulation |
| 200895    | DHFRL1       | 3983.85  | 12.81  | 6.22   | Downregulation |
| 10783     | NEK6         | 2627.18  | 43.58  | 21.18  | Downregulation |
| 5999      | RGS4         | 3147.55  | 130.8  | 63.63  | Downregulation |
| 85461     | TANC1        | 7508.55  | 10.19  | 4.96   | Downregulation |
| 55357     | TBC1D2       | 3207.83  | 20.41  | 9.94   | Downregulation |
| 6526      | SLC5A3       | 11623    | 10.81  | 5.27   | Downregulation |
| 134957    | STXBP5       | 9291     | 16.61  | 8.11   | Downregulation |
| 6894      | TARBP1       | 5130     | 7.76   | 3.79   | Downregulation |
| 10150     | MBNL2        | 4656.12  | 22.03  | 10.76  | Downregulation |
| 2650      | GCNT1        | 5559.61  | 4.36   | 2.13   | Downregulation |
| 4091      | SMAD6        | 2886     | 4.83   | 2.36   | Downregulation |
| 4254      | KITLG        | 5460     | 2.72   | 1.33   | Downregulation |
| 343450    | KCNT2        | 5818.29  | 6.83   | 3.34   | Downregulation |
| 2122      | MECOM        | 5374.56  | 4.74   | 2.32   | Downregulation |
| 6586      | SLIT3        | 9727     | 5      | 2.45   | Downregulation |
| 54899     | PXK          | 2869.21  | 31.18  | 15.28  | Downregulation |
| 79674     | VEPH1        | 3902.4   | 21.15  | 10.37  | Downregulation |
| 57574     | 4-Mar        | 4466     | 5.18   | 2.54   | Downregulation |
| 100302736 | TMED7-TICAM2 | 3655     | 4.18   | 2.05   | Downregulation |
| 9652      | TTC37        | 5704     | 27.56  | 13.53  | Downregulation |
| 3177      | SLC29A2      | 2608.13  | 5.31   | 2.61   | Downregulation |
| 100288142 | NBPF20       | 18450    | 3.17   | 1.56   | Downregulation |
| 79006     | METRN        | 1109     | 15.05  | 7.42   | Downregulation |
| 4919      | ROR1         | 4250.54  | 1.58   | 0.78   | Downregulation |
| 4133      | MAP2         | 5801.29  | 10.39  | 5.13   | Downregulation |
| 57102     | C12orf4      | 3868     | 7.53   | 3.72   | Downregulation |
| 22847     | ZNF507       | 7693.56  | 3.64   | 1.8    | Downregulation |
| 23175     | LPIN1        | 4312.52  | 17.7   | 8.76   | Downregulation |
| 26136     | TES          | 2743.36  | 25.26  | 12.51  | Downregulation |
| 101927755 | LOC101927755 | 1521.15  | 7.73   | 3.83   | Downregulation |
| 7145      | TNS1         | 10036.05 | 14.02  | 6.95   | Downregulation |
| 3856      | KRT8         | 1907.63  | 203.85 | 101.09 | Downregulation |
| 5793      | PTPRG        | 6648     | 5.57   | 2.77   | Downregulation |
| 10602     | CDC42EP3     | 5165.49  | 60.68  | 30.2   | Downregulation |

|           |             |      |       |      |                |
|-----------|-------------|------|-------|------|----------------|
| 100505385 | IQCJ-SCHIP1 | 2384 | 6.65  | 3.32 | Downregulation |
| 9262      | STK17B      | 5324 | 16.92 | 8.45 | Downregulation |
| 100861518 | P4HA2-AS1   | 836  | 10.87 | 5.43 | Downregulation |
| 8850      | KAT2B       | 4824 | 13.72 | 6.86 | Downregulation |
| 55196     | KIAA1551    | 6246 | 9.18  | 4.59 | Downregulation |
| 55785     | FGD6        | 9288 | 7.56  | 3.78 | Downregulation |

---
